# Supplementary material for: Epithelial tubule interconnection driven by HGF-Met signaling in the kidney
Source: PubMed Central journal article supplement — bioRxiv. 2024 Jun 3:2024.06.03.597185. Preprint. [Version 1] doi: 10.1101/2024.06.03.597185 (PMC11185679; doi:10.1101/2024.06.03.597185), 2024-06-03

Supplemental Figure S1.

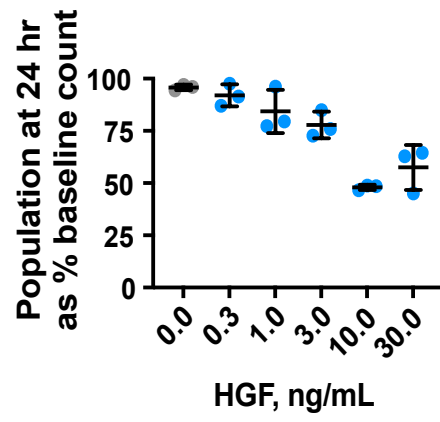

Supplemental Figure S2.

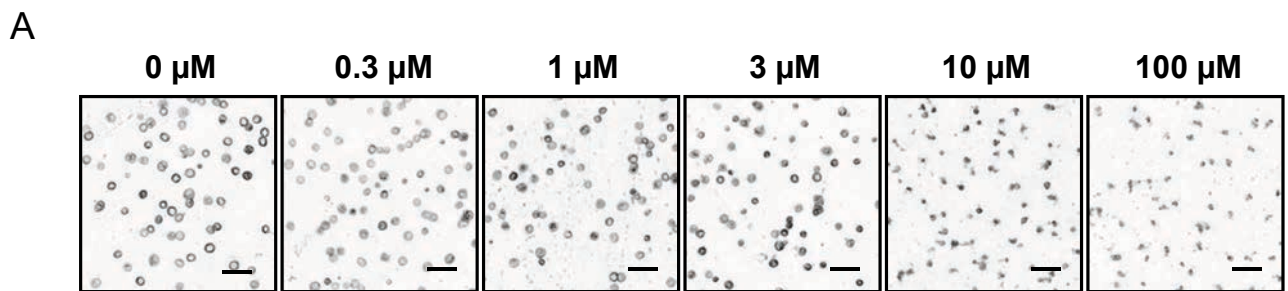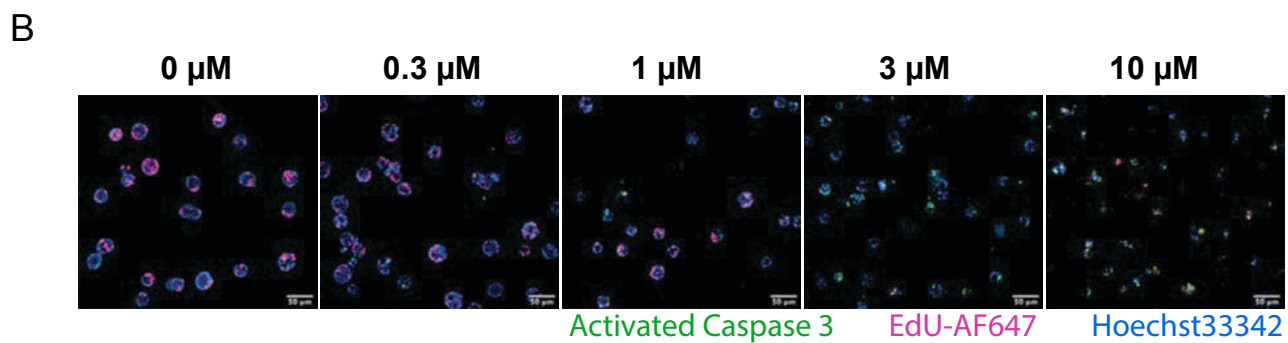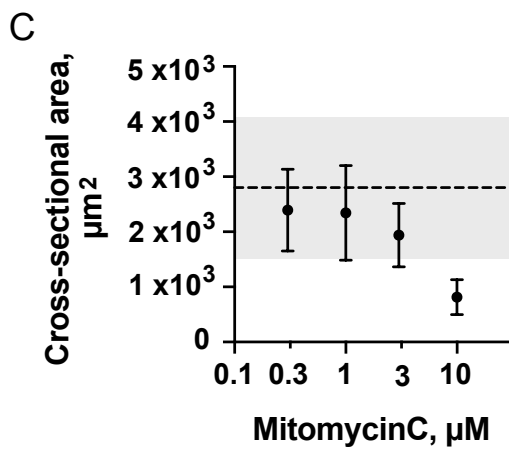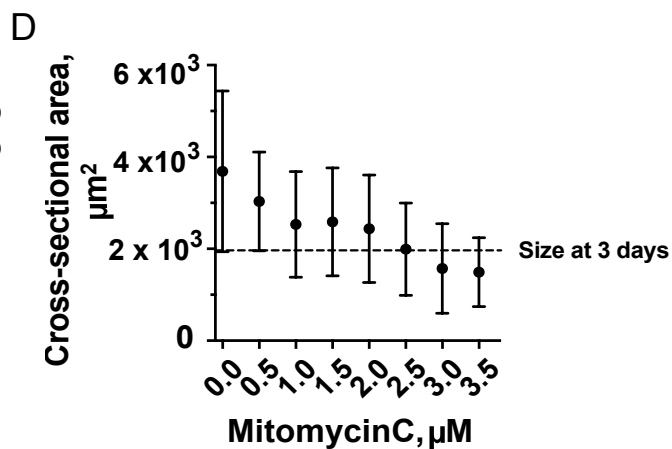

Supplemental Figure S3 .

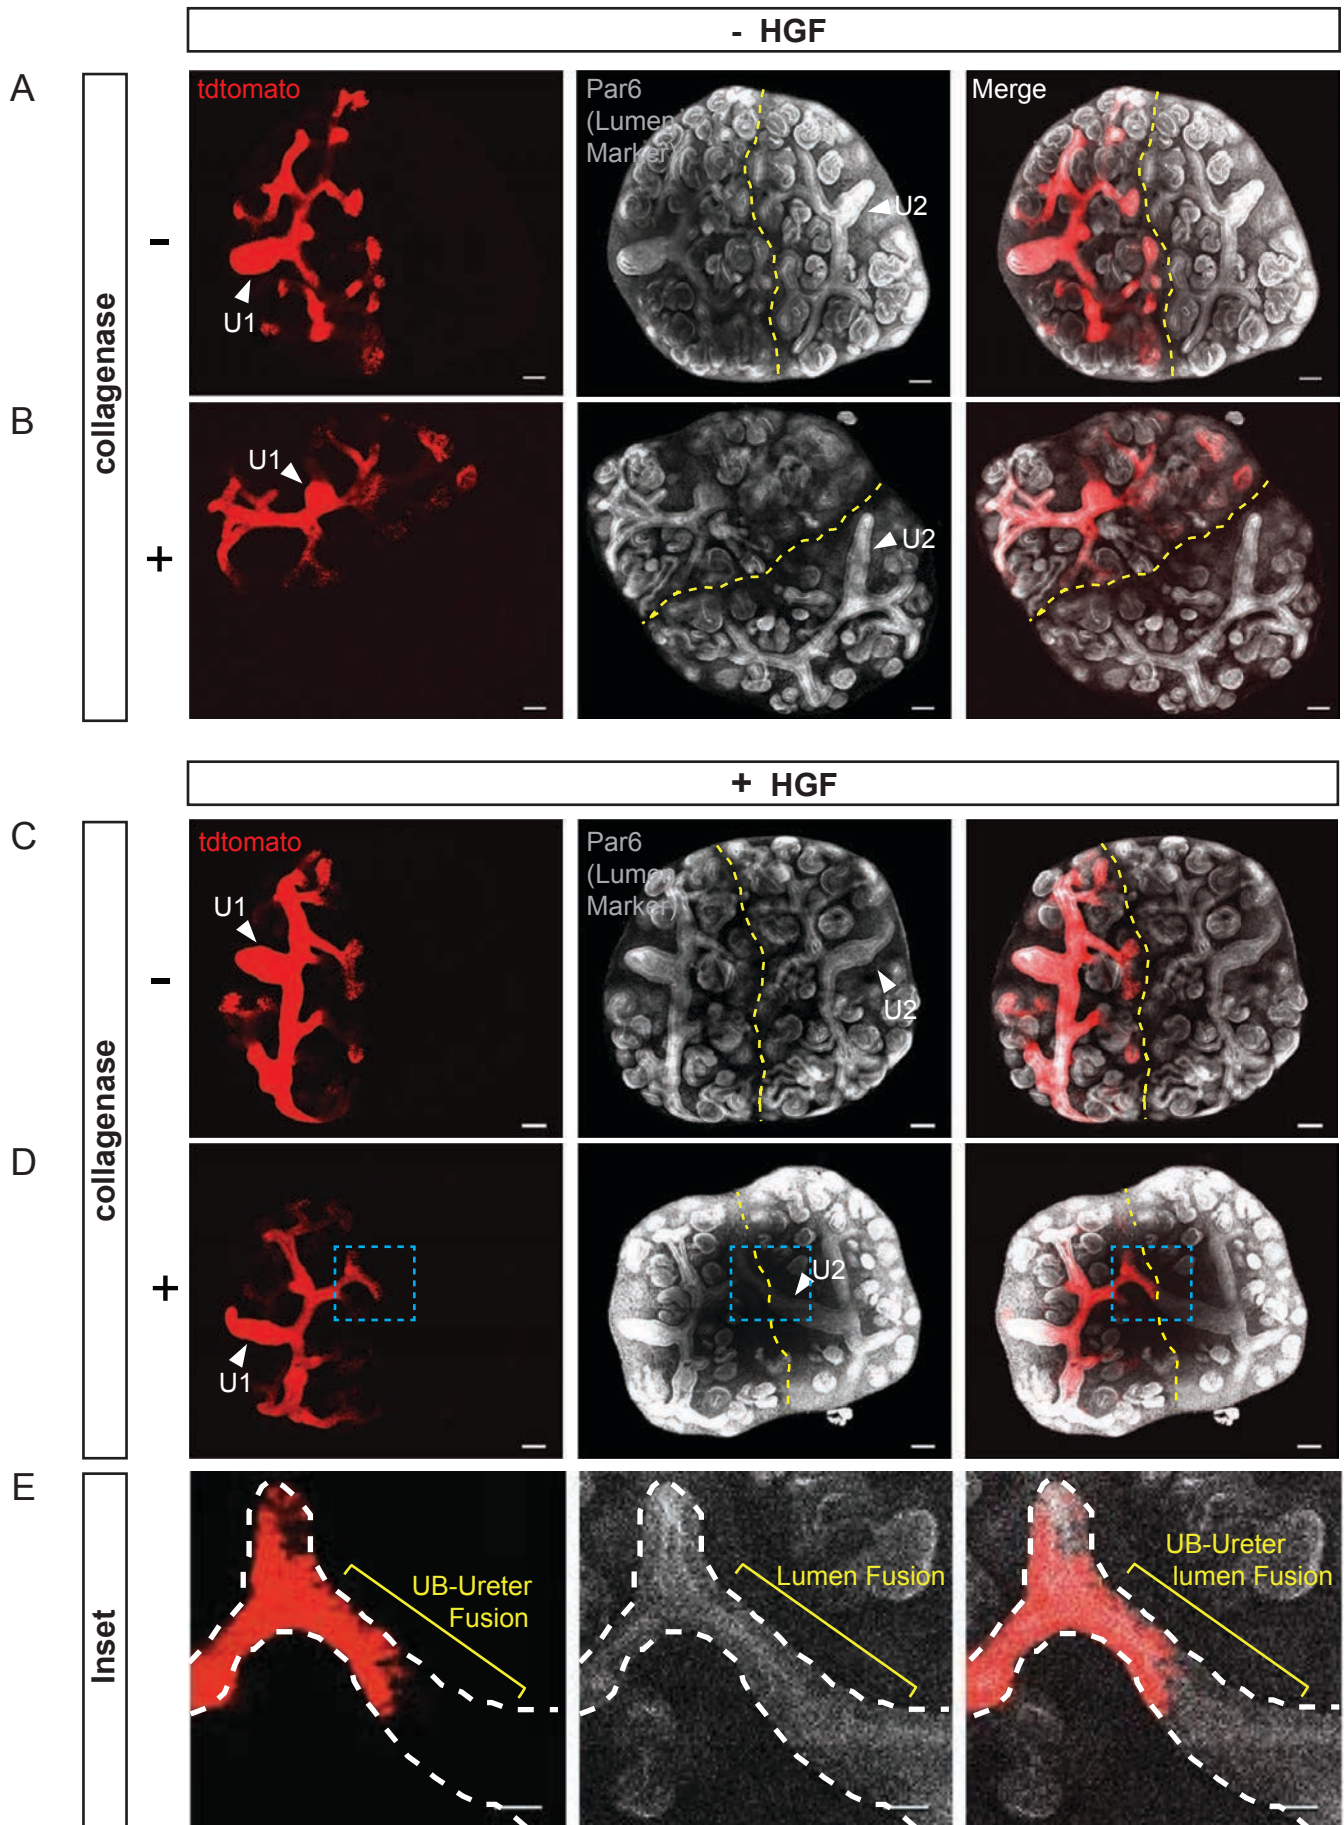

Supplement: media-1.pdf [file media-1.pdf]
