# Supplementary material for: Epithelial tubule interconnection driven by HGF-Met signaling in the kidney
Source: PubMed Central journal article supplement — bioRxiv. 2024 Jun 3:2024.06.03.597185. Preprint. [Version 1] doi: 10.1101/2024.06.03.597185 (PMC11185679; doi:10.1101/2024.06.03.597185), 2024-06-03
Supplement: media-2.pdf [file media-2.pdf]

Supplemental Table 1 SP1-RV

| Ligand  | Receptor | Ligand rank | Receptor rank | Interaction rank |
|---------|----------|-------------|---------------|------------------|
| Mfap2   | Notch1   | 56          | 157           | 1                |
| Dlk1    | Notch1   | 64          | 157           | 2                |
| Mfap5   | Notch1   | 66          | 157           | 3                |
| Fgf2    | Fgfr1    | 409         | 26            | 4                |
| Ncam1   | Fgfr1    | 531         | 26            | 5                |
| Efna5   | Epha4    | 533         | 113           | 6                |
| Ntf5    | Ngfr     | 534         | 175           | 7                |
| Fgf2    | Sdc1     | 409         | 329           | 8                |
| App     | Ngfr     | 650         | 175           | 9                |
| Lpl     | Sdc1     | 522         | 329           | 10               |
| Nid1    | Col13a1  | 712         | 158           | 11               |
| Cthrc1  | Fzd3     | 523         | 380           | 12               |
| Fgf2    | Fgfr1    | 409         | 495           | 13               |
| Adam17  | Notch1   | 790         | 157           | 14               |
| Inha    | Acvr2b   | 713         | 281           | 15               |
| App     | Gpc1     | 650         | 712           | 16               |
| Ntn1    | Unc5c    | 1           | 1383          | 17               |
| Fgf2    | Fgfr2    | 409         | 1003          | 18               |
| Lama4   | Itga6    | 26          | 1394          | 19               |
| Ntn1    | Unc5b    | 1           | 1437          | 20               |
| Efnb1   | Epha4    | 1359        | 113           | 21               |
| Ncam1   | Fgfr2    | 531         | 1003          | 22               |
| Efna5   | Epha7    | 533         | 1044          | 23               |
| Dlk1    | Notch2   | 64          | 1618          | 24               |
| Rspo3   | Lgr4     | 3           | 1708          | 25               |
| Ecm1    | Cachd1   | 140         | 1599          | 26               |
| Lamc1   | Itga6    | 349         | 1394          | 27               |
| Psap    | Celsr1   | 1311        | 472           | 28               |
| Col6a1  | Itga6    | 443         | 1394          | 29               |
| Efna5   | Ephb1    | 533         | 1571          | 30               |
| Fgf9    | Fgfr1    | 2224        | 26            | 31               |
| Lrpap1  | Sor1     | 390         | 1996          | 32               |
| Lama4   | Itga3    | 26          | 2445          | 33               |
| Wnt5a   | Fzd4     | 758         | 1769          | 34               |
| Rspo3   | Lgr6     | 3           | 2551          | 35               |
| Col5a2  | Ddr1     | 138         | 2425          | 36               |
| Nid2    | Col13a1  | 2419        | 158           | 37               |
| Col1a1  | Ddr1     | 210         | 2425          | 38               |
| Tgfb3   | Tgfb1    | 17          | 2619          | 39               |
| Rein    | Itga3    | 196         | 2445          | 40               |
| Wnt5a   | Ryk      | 758         | 1954          | 41               |
| Ncam1   | Robo1    | 531         | 2214          | 42               |
| Fn1     | Col13a1  | 2611        | 158           | 43               |
| Lamc1   | Itga3    | 349         | 2445          | 44               |
| Efnb1   | Ephb1    | 1359        | 1571          | 45               |
| Igf2    | Igf1r    | 199         | 2769          | 46               |
| Igf1    | Igf1r    | 358         | 2769          | 47               |
| Nid1    | Itga3    | 712         | 2445          | 48               |
| Thbs1   | Sdc1     | 2834        | 329           | 49               |
| Col11a1 | Ddr1     | 742         | 2425          | 50               |
| Rspo3   | Sdc4     | 3           | 3185          | 51               |
| Hgf     | Sdc1     | 2892        | 329           | 52               |
| Fgf18   | Fgfr1    | 3198        | 26            | 53               |
| Apoe    | Sor1     | 1228        | 1996          | 54               |
| Fgf9    | Fgfr2    | 2224        | 1003          | 55               |
| App     | Slc45a3  | 650         | 2593          | 56               |
| Tfpi    | Sdc4     | 62          | 3185          | 57               |
| Ntn1    | Neo1     | 1           | 3329          | 58               |
| Lrpap1  | Ldlr     | 390         | 2949          | 59               |
| Col3a1  | Ddr1     | 990         | 2425          | 60               |
| Gm11808 | Notch1   | 3293        | 157           | 61               |
| Dlk1    | Notch4   | 64          | 3487          | 62               |
| Fgf2    | Sdc4     | 409         | 3185          | 63               |
| Tgfb2   | Tgfb1    | 996         | 2619          | 64               |
| Lrpap1  | Lrp2     | 390         | 3305          | 65               |
| Rarres2 | Gpr1     | 444         | 3262          | 66               |
| B2m     | Tfrc     | 2338        | 1399          | 67               |
| Lama5   | Sdc1     | 3446        | 329           | 68               |
| Lamb1   | Itga6    | 2411        | 1394          | 69               |
| Apoe    | Scarb1   | 1228        | 2581          | 70               |
| Lpl     | Lrp2     | 522         | 3305          | 71               |
| Gdnf    | Gfra1    | 343         | 3510          | 72               |
| Tgm2    | Sdc4     | 670         | 3185          | 73               |
| Timp2   | Itga3    | 1435        | 2445          | 74               |
| Thbs2   | Itga6    | 2491        | 1394          | 75               |
| Rgma    | Neo1     | 560         | 3329          | 76               |
| Hspg2   | Col13a1  | 3760        | 158           | 77               |
| Il2     | Ngfr     | 3746        | 175           | 78               |
| Myoc    | Fzd3     | 3613        | 380           | 79               |
| Fn1     | Itga6    | 2611        | 1394          | 80               |
| Ncam1   | Gfra1    | 531         | 3510          | 81               |
| Lamc1   | Itgb4    | 349         | 3720          | 82               |
| Hspg2   | Sdc1     | 3760        | 329           | 83               |
| Myoc    | Fzd10    | 3613        | 486           | 84               |
| Sfrp1   | Fzd6     | 36          | 4071          | 85               |
| Efna4   | Epha4    | 3996        | 113           | 86               |
| Wnt5a   | Fzd7     | 758         | 3385          | 87               |
| Nid1    | Ptprf    | 712         | 3463          | 88               |
| Apoe    | Ldlr     | 1228        | 2949          | 89               |
| Fgf18   | Fgfr2    | 3198        | 1003          | 90               |
| Thbs1   | Itga6    | 2834        | 1394          | 91               |
| Dll4    | Notch1   | 4152        | 157           | 92               |
| Rspo3   | Fzd8     | 3           | 4361          | 93               |
| Tfpi    | F3       | 62          | 4372          | 94               |
| Apoe    | Lrp2     | 1228        | 3305          | 95               |
| Cthrc1  | Fzd6     | 523         | 4071          | 96               |
| Rtn4    | Ngfr     | 4503        | 175           | 97               |
| Nrtn    | Gfra1    | 1241        | 3510          | 98               |
| Wnt5a   | Fzd6     | 758         | 4071          | 99               |
| Efna3   | Epha4    | 4717        | 113           | 100              |

Supplemental Table 1 SP1-UB

| Ligand  | Receptor | Ligand rank | Receptor rank | Interaction rank |
|---------|----------|-------------|---------------|------------------|
| Tfpi    | Vldlr    | 62          | 29            | 1                |
| Ntn1    | Neo1     | 1           | 215           | 2                |
| Reln    | Vldlr    | 196         | 29            | 3                |
| Rspo3   | Lgr5     | 3           | 298           | 4                |
| Gdnf    | Gfra1    | 343         | 2             | 5                |
| Gdnf    | Ret      | 343         | 3             | 6                |
| Lrpap1  | Vldlr    | 390         | 29            | 7                |
| Ncam1   | Gfra1    | 531         | 2             | 8                |
| Fgf2    | Fgfr2    | 409         | 137           | 9                |
| Lpl     | Vldlr    | 522         | 29            | 10               |
| Ncam1   | Fgfr2    | 531         | 137           | 11               |
| Rgma    | Bmpr1b   | 560         | 130           | 12               |
| Rgma    | Neo1     | 560         | 215           | 13               |
| Nid1    | Ptprf    | 712         | 352           | 14               |
| Ntn1    | Unc5b    | 1           | 1104          | 15               |
| Nrtn    | Gfra1    | 1241        | 2             | 16               |
| Nrtn    | Ret      | 1241        | 3             | 17               |
| Apoe    | Vldlr    | 1228        | 29            | 18               |
| Rspo3   | Sdc4     | 3           | 1432          | 19               |
| Igf2    | Igf1r    | 199         | 1258          | 20               |
| Dcn     | Met      | 446         | 1018          | 21               |
| Tfpi    | Sdc4     | 62          | 1432          | 22               |
| Igf1    | Igf1r    | 358         | 1258          | 23               |
| Lrpap1  | Sort1    | 390         | 1356          | 24               |
| Efna5   | Ephb2    | 533         | 1248          | 25               |
| Fgf2    | Sdc4     | 409         | 1432          | 26               |
| Efna5   | Epha4    | 533         | 1380          | 27               |
| Wnt5a   | Fzd4     | 758         | 1222          | 28               |
| Lama4   | Itga6    | 26          | 1961          | 29               |
| Tgm2    | Sdc4     | 670         | 1432          | 30               |
| Tbc1d24 | Neo1     | 1989        | 215           | 31               |
| Ltbp3   | Itgb5    | 489         | 1810          | 32               |
| Lamc1   | Itga6    | 349         | 1961          | 33               |
| Fgf9    | Fgfr2    | 2224        | 137           | 34               |
| Efnb1   | Erbp2    | 1359        | 1009          | 35               |
| App     | Slc45a3  | 650         | 1721          | 36               |
| Col6a1  | Itga6    | 443         | 1961          | 37               |
| Cthrc1  | Fzd3     | 523         | 1947          | 38               |
| Tfpi    | F3       | 62          | 2452          | 39               |
| Vegfb   | Ret      | 2511        | 3             | 40               |
| Btc     | Erbp2    | 1555        | 1009          | 41               |
| Efnb1   | Ephb2    | 1359        | 1248          | 42               |
| Psap    | Sort1    | 1311        | 1356          | 43               |
| Cntn4   | Ptprg    | 377         | 2348          | 44               |
| Efnb1   | Epha4    | 1359        | 1380          | 45               |
| Efna5   | Epha1    | 533         | 2389          | 46               |
| Mfap2   | Notch1   | 56          | 2893          | 47               |
| Dlk1    | Notch1   | 64          | 2893          | 48               |
| Mfap5   | Notch1   | 66          | 2893          | 49               |
| Fgf2    | Fgfr1    | 409         | 2614          | 50               |
| Hgf     | St14     | 2892        | 255           | 51               |
| Apoe    | Scarb1   | 1228        | 2071          | 52               |
| Rspo3   | Lrp6     | 3           | 3312          | 53               |
| Fgf18   | Fgfr2    | 3198        | 137           | 54               |
| Btc     | Erbp3    | 1555        | 1843          | 55               |
| Gm11808 | Bmpr1b   | 3293        | 130           | 56               |
| Cicf1   | Crif1    | 3589        | 10            | 57               |
| Adam17  | Notch1   | 790         | 2893          | 58               |
| Wnt5a   | Ror1     | 758         | 3115          | 59               |
| Hgf     | Met      | 2892        | 1018          | 60               |
| Lama4   | Itga3    | 26          | 3958          | 61               |
| Reln    | Itga3    | 196         | 3958          | 62               |
| Inha    | Acvr2a   | 713         | 3452          | 63               |
| Lama5   | Bcam     | 3446        | 772           | 64               |
| Thbs1   | Sdc4     | 2834        | 1432          | 65               |
| Lamc1   | Itgb4    | 349         | 3929          | 66               |
| Gm11808 | Erbp2    | 3293        | 1009          | 67               |
| Lamc1   | Itga3    | 349         | 3958          | 68               |
| Lamb1   | Itga6    | 2411        | 1961          | 69               |
| Gnai2   | Adora1   | 4185        | 214           | 70               |
| Dcn     | Erbp4    | 446         | 3994          | 71               |
| Dkk2    | Lrp6     | 1132        | 3312          | 72               |
| Thbs2   | Itga6    | 2491        | 1961          | 73               |
| Rspo1   | Lgr5     | 4273        | 298           | 74               |
| Fn1     | Itga6    | 2611        | 1961          | 75               |
| Ltbp1   | Itgb5    | 2782        | 1810          | 76               |
| Ntn1    | Unc5c    | 1           | 4592          | 77               |
| App     | Gpc1     | 650         | 3959          | 78               |
| Nid1    | Itga3    | 712         | 3958          | 79               |
| Wnt5a   | Ryk      | 758         | 3918          | 80               |
| Wnt5a   | Lrp5     | 758         | 3923          | 81               |
| Lrpap1  | Sorl1    | 390         | 4292          | 82               |
| Igfbp4  | Lrp6     | 1415        | 3312          | 83               |
| Sfrp1   | Fzd6     | 36          | 4716          | 84               |
| Adam17  | Erbp4    | 790         | 3994          | 85               |
| Thbs1   | Itga6    | 2834        | 1961          | 86               |
| Fgf2    | Sdc1     | 409         | 4403          | 87               |
| Myoc    | Fzd4     | 3613        | 1222          | 88               |
| Clec11a | Kit      | 153         | 4751          | 89               |
| Thbs1   | Scarb1   | 2834        | 2071          | 90               |
| Lpl     | Sdc1     | 522         | 4403          | 91               |
| Tgfb3   | Tgfb1    | 17          | 4970          | 92               |
| Apoe    | Lrp5     | 1228        | 3923          | 93               |
| Efna5   | Ephb6    | 533         | 4629          | 94               |
| Fbn1    | Itgb6    | 858         | 4308          | 95               |
| Cthrc1  | Fzd6     | 523         | 4716          | 96               |
| Ndp     | Fzd4     | 4032        | 1222          | 97               |
| Gnai2   | Unc5b    | 4185        | 1104          | 98               |
| Fgf7    | Fgfr2    | 5191        | 137           | 99               |
| Efna4   | Epha4    | 3996        | 1380          | 100              |

Supplemental Table 1 SP2-RV

| Ligand   | Receptor  | Ligand rank | Receptor rank | Interaction rank |
|----------|-----------|-------------|---------------|------------------|
| Gdnf     | Gfra1     | 11          | 42            | 1                |
| Rspo3    | Lgr5      | 493         | 87            | 2                |
| Dkk1     | Lrp6      | 1           | 670           | 3                |
| Dkk2     | Lrp6      | 143         | 670           | 4                |
| Reln     | Vldlr     | 35          | 941           | 5                |
| Rspo3    | Lrp6      | 493         | 670           | 6                |
| Rspo3    | Fzd8      | 493         | 778           | 7                |
| Fgf2     | Sdc1      | 353         | 953           | 8                |
| Dlk1     | Notch1    | 149         | 1182          | 9                |
| Fgf2     | Fgfr4     | 353         | 1016          | 10               |
| Fgf2     | Fgfr1     | 353         | 1211          | 11               |
| Mfap2    | Notch1    | 411         | 1182          | 12               |
| Efna2    | Epha4     | 1615        | 15            | 13               |
| Gdf11    | Acvr2b    | 752         | 887           | 14               |
| Sema3a   | Plxna4    | 217         | 1457          | 15               |
| Fgf2     | Gpc4      | 353         | 1359          | 16               |
| Efna3    | Epha4     | 1710        | 15            | 17               |
| Nid1     | Ptprf     | 1216        | 568           | 18               |
| Lama4    | Itga6     | 1599        | 188           | 19               |
| Rspo3    | Lgr4      | 493         | 1322          | 20               |
| Slit2    | Robo1     | 1772        | 56            | 21               |
| Fn1      | Itga6     | 1677        | 188           | 22               |
| Cxcl12   | Sdc4      | 90          | 1887          | 23               |
| Efna2    | Epha7     | 1615        | 409           | 24               |
| Efna3    | Epha7     | 1710        | 409           | 25               |
| Gm11808  | Notch1    | 965         | 1182          | 26               |
| Efna4    | Epha4     | 2184        | 15            | 27               |
| Fgf2     | Sdc4      | 353         | 1887          | 28               |
| Igfbp4   | Lrp6      | 1633        | 670           | 29               |
| Col6a1   | Itga6     | 2165        | 188           | 30               |
| Rspo3    | Sdc4      | 493         | 1887          | 31               |
| Cxcl12   | Cxcr4     | 90          | 2292          | 32               |
| Igfbp4   | Fzd8      | 1633        | 778           | 33               |
| Efna4    | Epha7     | 2184        | 409           | 34               |
| Hgf      | St14      | 1795        | 883           | 35               |
| Slit2    | Sdc1      | 1772        | 953           | 36               |
| Fgf2     | Fgfr2     | 353         | 2386          | 37               |
| Hgf      | Sdc1      | 1795        | 953           | 38               |
| Gnai2    | Adra2a    | 743         | 2153          | 39               |
| Efnb3    | Epha4     | 2929        | 15            | 40               |
| Dkk1     | Lrp5      | 1           | 2948          | 41               |
| Dkk1     | Notch3    | 149         | 2806          | 42               |
| Lama2    | Itga6     | 2775        | 188           | 43               |
| Efna2    | Epha1     | 1615        | 1433          | 44               |
| Sema6a   | Plxna4    | 1619        | 1457          | 45               |
| Cntn4    | Ptprg     | 702         | 2382          | 46               |
| Tfpi     | Vldlr     | 2179        | 941           | 47               |
| Efna3    | Epha1     | 1710        | 1433          | 48               |
| Gm11808  | Bmpr1b    | 965         | 2234          | 49               |
| Fgf2     | Fgfr1     | 353         | 2857          | 50               |
| Ntn1     | Unc5b     | 211         | 3030          | 51               |
| Gnai2    | Adora1    | 743         | 2531          | 52               |
| Col5a2   | Ddr1      | 526         | 2830          | 53               |
| Wnt5a    | Fzd4      | 2830        | 532           | 54               |
| Col11a1  | Ddr1      | 557         | 2830          | 55               |
| Efnb3    | Ephb3     | 2929        | 505           | 56               |
| Hgf      | Met       | 1795        | 1677          | 57               |
| Reln     | Itga3     | 35          | 3453          | 58               |
| Gnai2    | Igf1r     | 743         | 2775          | 59               |
| Wnt5a    | Fzd8      | 2830        | 778           | 60               |
| Efna4    | Epha1     | 2184        | 1433          | 61               |
| Gnai2    | Unc5b     | 743         | 3030          | 62               |
| Tnc      | Sdc1      | 2907        | 953           | 63               |
| Col3a1   | Ddr1      | 1055        | 2830          | 64               |
| Col5a2   | Itga1     | 526         | 3428          | 65               |
| Col1a1   | Ddr1      | 1140        | 2830          | 66               |
| Col8a1   | F11r      | 2047        | 1954          | 67               |
| Tfpi     | Sdc4      | 2179        | 1887          | 68               |
| Col4a4   | Itga1     | 747         | 3428          | 69               |
| Fgf11    | Fgfr4     | 3248        | 1016          | 70               |
| Dcn      | ErbB4     | 3861        | 412           | 71               |
| Sema3a   | Nrp1      | 217         | 4131          | 72               |
| Fgf11    | Fgfr1     | 3248        | 1211          | 73               |
| Fgf2     | Nrp1      | 353         | 4131          | 74               |
| Col1a1   | Itga1     | 1140        | 3428          | 75               |
| Col1a2   | Itga1     | 1202        | 3428          | 76               |
| Nid1     | Itga3     | 1216        | 3453          | 77               |
| Thbs2    | Itga6     | 4504        | 188           | 78               |
| Wnt5a    | Ryk       | 2830        | 1931          | 79               |
| Tnc      | Sdc4      | 2907        | 1887          | 80               |
| Ngf      | Sort1     | 1125        | 3680          | 81               |
| Tnfrsf12 | Tnfrsf12a | 2450        | 2403          | 82               |
| Efna5    | Epha4     | 4997        | 15            | 83               |
| Lama4    | Itga3     | 1599        | 3453          | 84               |
| Efna3    | Ephb1     | 1710        | 3386          | 85               |
| Fn1      | Itga3     | 1677        | 3453          | 86               |
| Col5a1   | Itga1     | 1743        | 3428          | 87               |
| Col6a3   | Itga1     | 1751        | 3428          | 88               |
| Gm11808  | ErbB2     | 965         | 4262          | 89               |
| Adm      | Ramp2     | 1475        | 3867          | 90               |
| Mfap5    | Notch1    | 4182        | 1182          | 91               |
| Dll3     | Notch1    | 4222        | 1182          | 92               |
| Efna5    | Epha7     | 4997        | 409           | 93               |
| Bmp4     | Acvr2b    | 4533        | 887           | 94               |
| Dusp18   | Itga6     | 5237        | 188           | 95               |
| Slit2    | Gpc1      | 1772        | 3654          | 96               |
| Dcn      | Met       | 3861        | 1677          | 97               |
| Col6a2   | Itga1     | 2153        | 3428          | 98               |
| Col6a1   | Itga1     | 2165        | 3428          | 99               |
|          |           |             |               | 100              |

Supplemental Table 1 SP2-UB

| Ligand  | Receptor | Ligand rank | Receptor rank | Interaction rank |
|---------|----------|-------------|---------------|------------------|
| Gdnf    | Gfra1    | 11          | 2             | 1                |
| Gdnf    | Ret      | 11          | 3             | 2                |
| Reln    | Vldlr    | 35          | 29            | 3                |
| Ntn1    | Neo1     | 211         | 215           | 4                |
| Fgf2    | Fgfr2    | 353         | 137           | 5                |
| Rspo3   | Lgr5     | 493         | 298           | 6                |
| Gnai2   | Adora1   | 743         | 214           | 7                |
| Cxcl12  | Ackr3    | 90          | 920           | 8                |
| Gm11808 | Bmpr1b   | 965         | 130           | 9                |
| Ntn1    | Unc5b    | 211         | 1104          | 10               |
| Cxcl12  | Sdc4     | 90          | 1432          | 11               |
| Nid1    | Ptprf    | 1216        | 352           | 12               |
| Vegfb   | Ret      | 1671        | 3             | 13               |
| Fgf2    | Sdc4     | 353         | 1432          | 14               |
| Gnai2   | Unc5b    | 743         | 1104          | 15               |
| Rspo3   | Sdc4     | 493         | 1432          | 16               |
| Gm11808 | ErbB2    | 965         | 1009          | 17               |
| Gnai2   | Igf1r    | 743         | 1258          | 18               |
| Hgf     | St14     | 1795        | 255           | 19               |
| Tfpi    | Vldlr    | 2179        | 29            | 20               |
| Cxcl12  | Cxcr4    | 90          | 2294          | 21               |
| Ngf     | Sort1    | 1125        | 1356          | 22               |
| Tbc1d24 | Neo1     | 2496        | 215           | 23               |
| Hgf     | Met      | 1795        | 1018          | 24               |
| Fgf2    | Fgfr1    | 353         | 2614          | 25               |
| Ngf     | Maged1   | 1125        | 1863          | 26               |
| Efna2   | Epha4    | 1615        | 1380          | 27               |
| Dlk1    | Notch1   | 149         | 2893          | 28               |
| Cntn4   | Ptprg    | 702         | 2348          | 29               |
| Efna3   | Epha4    | 1710        | 1380          | 30               |
| Mfap2   | Notch1   | 411         | 2893          | 31               |
| Dkk1    | Lrp6     | 1           | 3312          | 32               |
| a       | F11r     | 2047        | 1329          | 33               |
| Fgf11   | Fgfr2    | 3248        | 137           | 34               |
| Dkk2    | Lrp6     | 143         | 3312          | 35               |
| Lama4   | Itga6    | 1599        | 1961          | 36               |
| Efna4   | Epha4    | 2184        | 1380          | 37               |
| Tfpi    | Sdc4     | 2179        | 1432          | 38               |
| Fn1     | Itga6    | 1677        | 1961          | 39               |
| Rspo3   | Lrp6     | 493         | 3312          | 40               |
| C1qtnf1 | Avpr2    | 2152        | 1671          | 41               |
| Gm11808 | Notch1   | 965         | 2893          | 42               |
| Rgma    | Bmpr1b   | 3740        | 130           | 43               |
| Edil3   | Itgb5    | 2081        | 1810          | 44               |
| Dkk1    | Lrp5     | 1           | 3923          | 45               |
| Rgma    | Neo1     | 3740        | 215           | 46               |
| Reln    | Itga3    | 35          | 3958          | 47               |
| Efna2   | Epha1    | 1615        | 2389          | 48               |
| Wnt5a   | Fzd4     | 2830        | 1222          | 49               |
| Efna3   | Epha1    | 1710        | 2389          | 50               |
| Col6a1  | Itga6    | 2165        | 1961          | 51               |
| Efnb3   | Ephb2    | 2929        | 1248          | 52               |
| Gdf11   | Acvr2a   | 752         | 3452          | 53               |
| Efnb3   | Epha4    | 2929        | 1380          | 54               |
| Tnc     | Sdc4     | 2907        | 1432          | 55               |
| Sema3a  | Plxna3   | 217         | 4314          | 56               |
| Efna4   | Epha1    | 2184        | 2389          | 57               |
| Tfpi    | F3       | 2179        | 2452          | 58               |
| Igf2    | Igf1r    | 3381        | 1258          | 59               |
| Bmp4    | Bmpr1b   | 4533        | 130           | 60               |
| Lama2   | Itga6    | 2775        | 1961          | 61               |
| Fgf2    | Sdc1     | 353         | 4403          | 62               |
| Ntn1    | Unc5c    | 211         | 4592          | 63               |
| Sema3a  | Plxna1   | 217         | 4622          | 64               |
| Dcn     | Met      | 3861        | 1018          | 65               |
| Igfbp4  | Lrp6     | 1633        | 3312          | 66               |
| Fn1     | Cd79a    | 1677        | 3334          | 67               |
| Tnc     | Ptprz1   | 2907        | 2170          | 68               |
| Nid1    | Itga3    | 1216        | 3958          | 69               |
| Tgfb3   | Tgfb1    | 238         | 4970          | 70               |
| Ltbp3   | Itgb5    | 3458        | 1810          | 71               |
| Fgf13   | Scn8a    | 5451        | 63            | 72               |
| Igf1    | Igf1r    | 4288        | 1258          | 73               |
| Lama4   | Itga3    | 1599        | 3958          | 74               |
| Fgf13   | Fgfr2    | 5451        | 137           | 75               |
| Fn1     | Itga3    | 1677        | 3958          | 76               |
| Nts     | Sort1    | 4296        | 1356          | 77               |
| Fbn1    | Itgb6    | 1363        | 4308          | 78               |
| Tgfb2   | Tgfb1    | 746         | 4970          | 79               |
| Fgf2    | Fgfr4    | 353         | 5365          | 80               |
| Slit2   | Gpc1     | 1772        | 3959          | 81               |
| Sfrp1   | Fzd6     | 1036        | 4716          | 82               |
| Vcam1   | Itga4    | 682         | 5129          | 83               |
| Gm11808 | Tgfb1    | 965         | 4970          | 84               |
| Wnt5a   | Ror1     | 2830        | 3115          | 85               |
| Sema3a  | Nrp1     | 217         | 5741          | 86               |
| Itgb3bp | Itgb5    | 4172        | 1810          | 87               |
| Fn1     | Itgb6    | 1677        | 4308          | 88               |
| Efnb3   | Rhbdl2   | 2929        | 3092          | 89               |
| App     | Slc45a3  | 4360        | 1721          | 90               |
| Fgf2    | Nrp1     | 353         | 5741          | 91               |
| Slit2   | Sdc1     | 1772        | 4403          | 92               |
| Hgf     | Sdc1     | 1795        | 4403          | 93               |
| Efna5   | Ephb2    | 4997        | 1248          | 94               |
| Col5a2  | Ddr1     | 526         | 5760          | 95               |
| Col11a1 | Ddr1     | 557         | 5760          | 96               |
| Efna3   | Ephb6    | 1710        | 4629          | 97               |
| Efna5   | Epha4    | 4997        | 1380          | 98               |
| Thbs2   | Itga6    | 4504        | 1961          | 99               |
| Tgfb3   | Eng      | 238         | 6245          | 100              |

Supplemental Table 1 SP3-RV

| Ligand   | Receptor  | Ligand rank | Receptor rank | Interaction rank |
|----------|-----------|-------------|---------------|------------------|
| Gdnf     | Gfra1     | 1           | 42            | 1                |
| Rspo3    | Lgr5      | 21          | 87            | 2                |
| Lama4    | Itga6     | 200         | 188           | 3                |
| Efna5    | Epha4     | 389         | 15            | 4                |
| Efna3    | Epha4     | 480         | 15            | 5                |
| Efna4    | Epha4     | 610         | 15            | 6                |
| Rspo3    | Lrp6      | 21          | 670           | 7                |
| Efna5    | Epha7     | 389         | 409           | 8                |
| Rspo3    | Fzd8      | 21          | 778           | 9                |
| Dkk1     | Lrp6      | 182         | 670           | 10               |
| Efna3    | Epha7     | 480         | 409           | 11               |
| Reln     | Vldlr     | 15          | 941           | 12               |
| Hgf      | St14      | 122         | 883           | 13               |
| Fgf2     | Sdc1      | 62          | 953           | 14               |
| Efna4    | Epha7     | 610         | 409           | 15               |
| Hgf      | Sdc1      | 122         | 953           | 16               |
| Fgf2     | Fgfr4     | 62          | 1016          | 17               |
| Fn1      | Itga6     | 965         | 188           | 18               |
| Fgf2     | Fgfr1     | 62          | 1211          | 19               |
| Mfap2    | Notch1    | 144         | 1182          | 20               |
| Rspo3    | Lgr4      | 21          | 1322          | 21               |
| Fgf2     | Gpc4      | 62          | 1359          | 22               |
| Dlk1     | Notch1    | 322         | 1182          | 23               |
| Gm11808  | Notch1    | 394         | 1182          | 24               |
| Tfpi     | Vldlr     | 746         | 941           | 25               |
| Hgf      | Met       | 122         | 1677          | 26               |
| Efna5    | Epha1     | 389         | 1433          | 27               |
| Rspo3    | Sdc4      | 21          | 1887          | 28               |
| Efna3    | Epha1     | 480         | 1433          | 29               |
| Fgf2     | Sdc4      | 62          | 1887          | 30               |
| Efna4    | Epha1     | 610         | 1433          | 31               |
| Cxcl12   | Sdc4      | 191         | 1887          | 32               |
| Sema6a   | Plxna4    | 623         | 1457          | 33               |
| Sema3a   | Plxna4    | 678         | 1457          | 34               |
| Dkk2     | Lrp6      | 1487        | 670           | 35               |
| Fgf2     | Fgfr2     | 62          | 2386          | 36               |
| Cxcl12   | Cxcr4     | 191         | 2292          | 37               |
| Gm11808  | Bmpr1b    | 394         | 2234          | 38               |
| Tfpi     | Sdc4      | 746         | 1887          | 39               |
| Rgma     | Bmpr1b    | 472         | 2234          | 40               |
| a        | F11r      | 847         | 1954          | 41               |
| Fgf2     | Fgfr1     | 62          | 2857          | 42               |
| Fgf13    | Scn8a     | 2407        | 565           | 43               |
| Ntn1     | Unc5b     | 20          | 3030          | 44               |
| Dlk1     | Notch3    | 322         | 2806          | 45               |
| Dkk1     | Lrp5      | 182         | 2948          | 46               |
| Bmp5     | Acvr2b    | 2263        | 887           | 47               |
| Col11a1  | Ddr1      | 339         | 2830          | 48               |
| Fgf13    | Fgfr4     | 2407        | 1016          | 49               |
| Igf2     | Igf1r     | 655         | 2775          | 50               |
| Wnt5a    | Fzd4      | 2916        | 532           | 51               |
| Reln     | Itga3     | 15          | 3453          | 52               |
| Col4a4   | Itga1     | 73          | 3428          | 53               |
| Col1a1   | Ddr1      | 679         | 2830          | 54               |
| Nrtn     | Gfra1     | 3492        | 42            | 55               |
| Col8a1   | Itga1     | 123         | 3428          | 56               |
| Efnb1    | Epha4     | 3587        | 15            | 57               |
| Fgf13    | Fgfr1     | 2407        | 1211          | 58               |
| Lama4    | Itga3     | 200         | 3453          | 59               |
| Wnt5a    | Fzd8      | 2916        | 778           | 60               |
| Cntn4    | Ptpqg     | 1330        | 2382          | 61               |
| Efna5    | Ephb1     | 389         | 3386          | 62               |
| Efna3    | Ephb1     | 480         | 3386          | 63               |
| Col5a2   | Ddr1      | 1184        | 2830          | 64               |
| Tnfrsf12 | Tnfrsf12a | 1624        | 2403          | 65               |
| Efnb1    | Ephb3     | 3587        | 505           | 66               |
| Col1a1   | Itga1     | 679         | 3428          | 67               |
| Col4a3   | Itga1     | 721         | 3428          | 68               |
| Efna5    | Ephb2     | 389         | 3777          | 69               |
| Fgf2     | Nrp1      | 62          | 4131          | 70               |
| Col3a1   | Ddr1      | 1386        | 2830          | 71               |
| Efnb3    | Epha4     | 4330        | 15            | 72               |
| Efna2    | Epha4     | 4350        | 15            | 73               |
| Nid1     | Ptpf      | 3848        | 568           | 74               |
| Tfpi     | F3        | 746         | 3671          | 75               |
| Fn1      | Itga3     | 965         | 3453          | 76               |
| Bmp5     | Bmpr1b    | 2263        | 2234          | 77               |
| Col5a2   | Itga1     | 1184        | 3428          | 78               |
| Gm11808  | Erb2      | 394         | 4262          | 79               |
| Gnai2    | Adra2a    | 2594        | 2153          | 80               |
| Efna2    | Epha7     | 4350        | 409           | 81               |
| a        | Mgm1      | 847         | 3929          | 82               |
| Fgf13    | Fgfr2     | 2407        | 2386          | 83               |
| Sema3a   | Nrp1      | 678         | 4131          | 84               |
| Efnb3    | Ephb3     | 4330        | 505           | 85               |
| Wnt5a    | Ryk       | 2916        | 1931          | 86               |
| Igfbp4   | Lrp6      | 4241        | 670           | 87               |
| Col1a2   | Itga1     | 1518        | 3428          | 88               |
| Sema3d   | Nrp1      | 823         | 4131          | 89               |
| Col6a1   | Itga6     | 4629        | 188           | 90               |
| Igfbp4   | Fzd8      | 4241        | 778           | 91               |
| Dusp18   | Itga6     | 4891        | 188           | 92               |
| Gnai2    | Adora1    | 2594        | 2531          | 93               |
| Col6a3   | Itga1     | 1818        | 3428          | 94               |
| Fgf11    | Fgfr4     | 4322        | 1016          | 95               |
| Gnai2    | Igf1r     | 2594        | 2775          | 96               |
| Lamc1    | Itga6     | 5223        | 188           | 97               |
| Penk     | Oprk1     | 406         | 5117          | 98               |
| Fgf11    | Fgfr1     | 4322        | 1211          | 99               |
| Gnai2    | Unc5b     | 2594        | 3030          | 100              |

Supplemental Table 1 SP3-UB

| Ligand  | Receptor | Ligand rank | Receptor rank | Interaction rank |
|---------|----------|-------------|---------------|------------------|
| Gdnf    | Gfra1    | 1           | 2             | 1                |
| Gdnf    | Ret      | 1           | 3             | 2                |
| Reln    | Vldlr    | 15          | 29            | 3                |
| Fgf2    | Fgfr2    | 62          | 137           | 4                |
| Ntn1    | Neo1     | 20          | 215           | 5                |
| Rspo3   | Lgr5     | 21          | 298           | 6                |
| Hgf     | St14     | 122         | 255           | 7                |
| Gm11808 | Bmpr1b   | 394         | 130           | 8                |
| Rgma    | Bmpr1b   | 472         | 130           | 9                |
| Rgma    | Neo1     | 472         | 215           | 10               |
| Tfpi    | Vldlr    | 746         | 29            | 11               |
| Cxcl12  | Ackr3    | 191         | 920           | 12               |
| Ntn1    | Unc5b    | 20          | 1104          | 13               |
| Hgf     | Met      | 122         | 1018          | 14               |
| Gm11808 | ErbB2    | 394         | 1009          | 15               |
| Rspo3   | Sdc4     | 21          | 1432          | 16               |
| Fgf2    | Sdc4     | 62          | 1432          | 17               |
| Cxcl12  | Sdc4     | 191         | 1432          | 18               |
| Efna5   | Ephb2    | 389         | 1248          | 19               |
| Efna5   | Epha4    | 389         | 1380          | 20               |
| Efna3   | Epha4    | 480         | 1380          | 21               |
| Igf2    | Igf1r    | 655         | 1258          | 22               |
| Efna4   | Epha4    | 610         | 1380          | 23               |
| Lama4   | Itga6    | 200         | 1961          | 24               |
| a       | F11r     | 847         | 1329          | 25               |
| Tfpi    | Sdc4     | 746         | 1432          | 26               |
| Bmp5    | Bmpr1b   | 2263        | 130           | 27               |
| Fgf13   | Scn8a    | 2407        | 63            | 28               |
| Cxcl12  | Cxcr4    | 191         | 2294          | 29               |
| Fgf13   | Fgfr2    | 2407        | 137           | 30               |
| Fgf2    | Fgfr1    | 62          | 2614          | 31               |
| Efna5   | Epha1    | 389         | 2389          | 32               |
| Gnai2   | Adora1   | 2594        | 214           | 33               |
| Vegfb   | Ret      | 2842        | 3             | 34               |
| Efna3   | Epha1    | 480         | 2389          | 35               |
| Tbc1d24 | Neo1     | 2676        | 215           | 36               |
| Fn1     | Itga6    | 965         | 1961          | 37               |
| Efna4   | Epha1    | 610         | 2389          | 38               |
| Ltbp3   | Itgb5    | 1203        | 1810          | 39               |
| Mfap2   | Notch1   | 144         | 2893          | 40               |
| Tfpi    | F3       | 746         | 2452          | 41               |
| Dkk1    | Notch1   | 322         | 2893          | 42               |
| Gm11808 | Notch1   | 394         | 2893          | 43               |
| Rspo3   | Lrp6     | 21          | 3312          | 44               |
| Nrtn    | Gfra1    | 3492        | 2             | 45               |
| Dkk1    | Lrp6     | 182         | 3312          | 46               |
| Nrtn    | Ret      | 3492        | 3             | 47               |
| Cntn4   | Ptprg    | 1330        | 2348          | 48               |
| Gnai2   | Unc5b    | 2594        | 1104          | 49               |
| Gnai2   | Igf1r    | 2594        | 1258          | 50               |
| Reln    | Itga3    | 15          | 3958          | 51               |
| Ngf     | Sort1    | 2635        | 1356          | 52               |
| Dkk1    | Lrp5     | 182         | 3923          | 53               |
| Wnt5a   | Fzd4     | 2916        | 1222          | 54               |
| Lama4   | Itga3    | 200         | 3958          | 55               |
| Nid1    | Ptprf    | 3848        | 352           | 56               |
| Fn1     | Cd79a    | 965         | 3334          | 57               |
| C1qtnf1 | Avpr2    | 2636        | 1671          | 58               |
| Fgf11   | Fgfr2    | 4322        | 137           | 59               |
| Fgf2    | Sdc1     | 62          | 4403          | 60               |
| Ngf     | Maged1   | 2635        | 1863          | 61               |
| Hgf     | Sdc1     | 122         | 4403          | 62               |
| Efnb1   | ErbB2    | 3587        | 1009          | 63               |
| Ntn1    | Unc5c    | 20          | 4592          | 64               |
| Dkk2    | Lrp6     | 1487        | 3312          | 65               |
| Edil3   | Itgb5    | 2995        | 1810          | 66               |
| Efnb1   | Ephb2    | 3587        | 1248          | 67               |
| Bmp5    | Bmpr1a   | 2263        | 2644          | 68               |
| Fn1     | Itga3    | 965         | 3958          | 69               |
| Efnb1   | Epha4    | 3587        | 1380          | 70               |
| Sema3a  | Plxna3   | 678         | 4314          | 71               |
| Efna5   | Ephb6    | 389         | 4629          | 72               |
| Sfrp1   | Fzd6     | 341         | 4716          | 73               |
| Tgfb3   | Tgfb1    | 87          | 4970          | 74               |
| Efna3   | Ephb6    | 480         | 4629          | 75               |
| Fn1     | Itgb6    | 965         | 4308          | 76               |
| Sema3a  | Plxna1   | 678         | 4622          | 77               |
| Tgfb2   | Tgfb1    | 386         | 4970          | 78               |
| Gm11808 | Tgfb1    | 394         | 4970          | 79               |
| Fgf2    | Fgfr4    | 62          | 5365          | 80               |
| Efnb3   | Ephb2    | 4330        | 1248          | 81               |
| Tgm2    | Sdc4     | 4146        | 1432          | 82               |
| Efnb3   | Epha4    | 4330        | 1380          | 83               |
| Bmp5    | Acvr2a   | 2263        | 3452          | 84               |
| Efna2   | Epha4    | 4350        | 1380          | 85               |
| Fgf2    | Nrp1     | 62          | 5741          | 86               |
| App     | Sloc45a3 | 4276        | 1721          | 87               |
| Wnt5a   | Ror1     | 2916        | 3115          | 88               |
| Fn1     | Itga4    | 965         | 5129          | 89               |
| Col11a1 | Ddr1     | 339         | 5760          | 90               |
| Lpl     | Vldlr    | 6115        | 29            | 91               |
| Tgfb3   | Eng      | 87          | 6245          | 92               |
| Sema3a  | Nrp1     | 678         | 5741          | 93               |
| Col1a1  | Ddr1     | 679         | 5760          | 94               |
| Fbn1    | Itgb6    | 2154        | 4308          | 95               |
| Sema3d  | Nrp1     | 823         | 5741          | 96               |
| Tgfb2   | Eng      | 386         | 6245          | 97               |
| Efna2   | Epha1    | 4350        | 2389          | 98               |
| Col6a1  | Itga6    | 4829        | 1961          | 99               |
| Wnt5a   | Ryk      | 2916        | 3918          | 100              |

Supplemental Table 1 RV-SP1

| Ligand    | Receptor  | Ligand rank | Receptor rank | Interaction rank |
|-----------|-----------|-------------|---------------|------------------|
| Npy       | Fap       | 8           | 16            | 1                |
| Wnt4      | Fzd2      | 9           | 70            | 2                |
| Pdgfa     | Pdgfra    | 29          | 89            | 3                |
| Bmp4      | Bmpr1a    | 345         | 203           | 4                |
| Efnb1     | Ephb2     | 446         | 168           | 5                |
| Vcan      | Egfr      | 280         | 379           | 6                |
| Ncam1     | Ptptra    | 215         | 605           | 7                |
| Bmp2      | Bmpr1a    | 802         | 203           | 8                |
| Plat      | Lrp1      | 593         | 545           | 9                |
| Rspo1     | Fzd8      | 151         | 1107          | 10               |
| Rspo1     | Lrp6      | 151         | 1188          | 11               |
| Tgfa      | Egfr      | 1041        | 379           | 12               |
| Lama1     | Itgb8     | 1135        | 372           | 13               |
| Vegfa     | Ephb2     | 1362        | 168           | 14               |
| Ntf3      | Ntrk2     | 1535        | 122           | 15               |
| Bmp7      | Bmpr1a    | 1472        | 203           | 16               |
| Efnb2     | Ephb2     | 1520        | 168           | 17               |
| Bmp4      | Acvr1     | 345         | 1347          | 18               |
| Vegfa     | Egfr      | 1362        | 379           | 19               |
| Lpl       | Lrp1      | 1525        | 545           | 20               |
| Lama1     | Sdc2      | 1135        | 986           | 21               |
| Bmp2      | Acvr1     | 802         | 1347          | 22               |
| Vcan      | Itgb1     | 280         | 2281          | 23               |
| Lama4     | Itgb1     | 312         | 2281          | 24               |
| Lamc1     | Itgb1     | 327         | 2281          | 25               |
| Bmp7      | Acvr1     | 1472        | 1347          | 26               |
| Lpl       | Sdc1      | 1525        | 1316          | 27               |
| Col4a1    | Itgb8     | 2644        | 372           | 28               |
| Gnai2     | Egfr      | 2696        | 379           | 29               |
| BC055324  | Plscr4    | 2071        | 1070          | 30               |
| Col2a1    | Itgb1     | 891         | 2281          | 31               |
| Pdgfa     | Pdgfrb    | 29          | 3165          | 32               |
| Vtn       | Tnfrsf11b | 3061        | 251           | 33               |
| Lamb1     | Itgb1     | 1034        | 2281          | 34               |
| Nppc      | Npr3      | 1719        | 1603          | 35               |
| Hras      | Sdc2      | 2346        | 986           | 36               |
| Vegfa     | Itga9     | 1362        | 2006          | 37               |
| Slit3     | Robo2     | 1956        | 1427          | 38               |
| Lamc1     | Itga1     | 327         | 3084          | 39               |
| Lama1     | Itgb1     | 1135        | 2281          | 40               |
| Col2a1    | Itga2b    | 891         | 2530          | 41               |
| Gm11808   | Egfr      | 3043        | 379           | 42               |
| Lama4     | Itgav     | 312         | 3116          | 43               |
| Vtn       | Itgb8     | 3061        | 372           | 44               |
| Lamc1     | Itgav     | 327         | 3116          | 45               |
| Gdf5      | Bmpr1a    | 3296        | 203           | 46               |
| Gnai2     | Tbxa2r    | 2696        | 841           | 47               |
| Tac2      | Tacr3     | 1499        | 2122          | 48               |
| Gnai2     | Agt2      | 2696        | 928           | 49               |
| Hras      | Cav1      | 2346        | 1294          | 50               |
| Vegfa     | Itgb1     | 1362        | 2281          | 51               |
| Lamc2     | Cd151     | 2453        | 1269          | 52               |
| Prss23    | Tmem222   | 1048        | 2805          | 53               |
| Col4a1    | Cd47      | 2644        | 1260          | 54               |
| Col2a1    | Itga1     | 891         | 3084          | 55               |
| Gnai2     | Cav1      | 2696        | 1294          | 56               |
| Sema3f    | Nrp1      | 748         | 3252          | 57               |
| L1cam     | Ephb2     | 3935        | 168           | 58               |
| Lamb1     | Itga1     | 1034        | 3084          | 59               |
| Gdf5      | Ror2      | 3296        | 825           | 60               |
| Timp2     | Itgb1     | 1841        | 2281          | 61               |
| Cdh1      | Egfr      | 3752        | 379           | 62               |
| Lamb1     | Itgav     | 1034        | 3116          | 63               |
| Lama1     | Itga1     | 1135        | 3084          | 64               |
| Sost      | Lrp6      | 3095        | 1188          | 65               |
| L1cam     | Egfr      | 3935        | 379           | 66               |
| Rgmb      | Neo1      | 3588        | 726           | 67               |
| Vtn       | Cd47      | 3061        | 1260          | 68               |
| Cdh1      | Cdh2      | 3752        | 585           | 69               |
| Adam10    | Axl       | 3668        | 707           | 70               |
| Gm11808   | Acvr1     | 3043        | 1347          | 71               |
| Slit2     | Sdc1      | 3090        | 1316          | 72               |
| Vegfa     | Itgav     | 1362        | 3116          | 73               |
| Npy       | Npy2r     | 8           | 4478          | 74               |
| Slit2     | Robo2     | 3090        | 1427          | 75               |
| Efnb1     | Ephb3     | 446         | 4130          | 76               |
| Col18a1   | Gpc4      | 3600        | 992           | 77               |
| Vegfa     | Nrp1      | 1362        | 3252          | 78               |
| Gdf5      | Acvr1     | 3296        | 1347          | 79               |
| Sema4c    | Plxn2     | 3580        | 1101          | 80               |
| Lamc2     | Itgb1     | 2453        | 2281          | 81               |
| Vegfc     | Itga9     | 2908        | 2006          | 82               |
| Col4a1    | Itgb1     | 2644        | 2281          | 83               |
| Efnb1     | Ephb4     | 446         | 4581          | 84               |
| Mfge8     | Itgav     | 2059        | 3116          | 85               |
| Vegfc     | Itgb1     | 2908        | 2281          | 86               |
| Efnb5     | Ephb2     | 5025        | 168           | 87               |
| Gnai2     | S1pr3     | 2696        | 2500          | 88               |
| Mfge8     | Pdgfrb    | 2059        | 3165          | 89               |
| Pdgfc     | Pdgfra    | 5137        | 89            | 90               |
| Lama1     | Gpc1      | 1135        | 4138          | 91               |
| Serpina1a | Lrp1      | 4787        | 545           | 92               |
| Vtn       | Itgb1     | 3061        | 2281          | 93               |
| Vegfa     | Kdr       | 1362        | 3991          | 94               |
| Lama5     | Sdc1      | 4093        | 1316          | 95               |
| Npnt      | Itgb1     | 3150        | 2281          | 96               |
| Fbln1     | Itgb1     | 3199        | 2281          | 97               |
| Vegfa     | Gpc1      | 1362        | 4138          | 98               |
| Lama1     | Nt5e      | 1135        | 4371          | 99               |
| C1cf1     | Il6st     | 1341        | 4172          | 100              |

Supplemental Table 1 RV-SP2

| Ligand  | Receptor | Ligand rank | Receptor rank | Interaction rank |
|---------|----------|-------------|---------------|------------------|
| Pdgfa   | Pdgfrb   | 29          | 23            | 1                |
| Pdgfa   | Pdgfra   | 29          | 756           | 2                |
| Sema3f  | Nrp1     | 748         | 215           | 3                |
| Ncam1   | Fgfr1    | 215         | 888           | 4                |
| Npy     | Fap      | 8           | 1236          | 5                |
| Vegfa   | Itga9    | 1362        | 130           | 6                |
| Lamc1   | Itga1    | 327         | 1225          | 7                |
| Vegfa   | Nrp1     | 1362        | 215           | 8                |
| Vcan    | Egfr     | 280         | 1299          | 9                |
| Jag1    | Notch3   | 94          | 1521          | 10               |
| Fgf8    | Fgfr1    | 977         | 888           | 11               |
| Fgf15   | Fgfr1    | 1023        | 888           | 12               |
| Mfge8   | Pdgfrb   | 2059        | 23            | 13               |
| Dil1    | Notch3   | 583         | 1521          | 14               |
| Col2a1  | Itga1    | 891         | 1225          | 15               |
| Ncam1   | Robo1    | 215         | 1934          | 16               |
| Lama1   | Itgb8    | 1135        | 1100          | 17               |
| Lamb1   | Itga1    | 1034        | 1225          | 18               |
| Bmp2    | Eng      | 802         | 1503          | 19               |
| Tgfa    | Egfr     | 1041        | 1299          | 20               |
| Lama1   | Itga1    | 1135        | 1225          | 21               |
| Ncam1   | Cacna1c  | 215         | 2215          | 22               |
| Vcan    | Itgb1    | 280         | 2286          | 23               |
| Lama4   | Itgb1    | 312         | 2286          | 24               |
| Lamc1   | Itgb1    | 327         | 2286          | 25               |
| Jag1    | Notch1   | 94          | 2535          | 26               |
| Wnt4    | Fzd2     | 9           | 2644          | 27               |
| Vegfa   | Egfr     | 1362        | 1299          | 28               |
| Bmp4    | Bmpr1a   | 345         | 2345          | 29               |
| Bmp4    | Acvr1    | 345         | 2361          | 30               |
| Gnai2   | F2r      | 2696        | 59            | 31               |
| Gnai2   | S1pr3    | 2696        | 106           | 32               |
| Plat    | Lrp1     | 593         | 2219          | 33               |
| Cicf1   | Cntfr    | 1341        | 1550          | 34               |
| Gnai2   | Ednra    | 2696        | 208           | 35               |
| Bmp7    | Eng      | 1472        | 1503          | 36               |
| Vegfc   | Itga9    | 2908        | 130           | 37               |
| Gnai2   | Agtr2    | 2696        | 385           | 38               |
| Prss23  | Tmem222  | 1048        | 2058          | 39               |
| Dil1    | Notch1   | 583         | 2535          | 40               |
| Bmp2    | Bmpr1a   | 802         | 2345          | 41               |
| Bmp2    | Acvr1    | 802         | 2361          | 42               |
| Col2a1  | Itgb1    | 891         | 2286          | 43               |
| Ltbp1   | Itgb5    | 462         | 2719          | 44               |
| Lamb1   | Itgb1    | 1034        | 2286          | 45               |
| Lama1   | Itgb1    | 1135        | 2286          | 46               |
| Vtn     | Itga8    | 3061        | 521           | 47               |
| Vegfa   | Itgb1    | 1362        | 2286          | 48               |
| Npnt    | Itga8    | 3150        | 521           | 49               |
| Col4a1  | Itgb8    | 2644        | 1100          | 50               |
| Lpl     | Lrp1     | 1525        | 2219          | 51               |
| Bmp7    | Bmpr1a   | 1472        | 2345          | 52               |
| Bmp4    | Acvr2a   | 345         | 3481          | 53               |
| Bmp7    | Acvr1    | 1472        | 2361          | 54               |
| Col4a1  | Itga1    | 2644        | 1225          | 55               |
| Slit3   | Robo2    | 1956        | 1917          | 56               |
| Itgb3bp | Itgb5    | 1180        | 2719          | 57               |
| Gnai2   | Egfr     | 2696        | 1299          | 58               |
| Lama4   | Itgav    | 312         | 3688          | 59               |
| Lamc1   | Itgav    | 327         | 3688          | 60               |
| Fgf9    | Fgfr1    | 3166        | 888           | 61               |
| Bmp4    | Bmpr2    | 345         | 3711          | 62               |
| Edn1    | Ednra    | 3859        | 208           | 63               |
| Gdf5    | Ror2     | 3296        | 786           | 64               |
| Timp2   | Itgb1    | 1841        | 2286          | 65               |
| Vtn     | Itgb8    | 3061        | 1100          | 66               |
| Cicf1   | Il6st    | 1341        | 2891          | 67               |
| Gnai2   | Ptpnu    | 2696        | 1583          | 68               |
| Bmp2    | Acvr2a   | 802         | 3481          | 69               |
| Gm11808 | Egfr     | 3043        | 1299          | 70               |
| Nppc    | Npr3     | 1719        | 2743          | 71               |
| Adam10  | Axl      | 3668        | 824           | 72               |
| Bmp2    | Bmpr2    | 802         | 3711          | 73               |
| Jag1    | Notch4   | 94          | 4507          | 74               |
| Lamb1   | Itgav    | 1034        | 3688          | 75               |
| Lamc2   | Itgb1    | 2453        | 2286          | 76               |
| Hras    | Agtr1a   | 2346        | 2400          | 77               |
| Col4a1  | Itgb1    | 2644        | 2286          | 78               |
| Bmp7    | Acvr2a   | 1472        | 3481          | 79               |
| Slit2   | Robo2    | 3090        | 1917          | 80               |
| Slit2   | Robo1    | 3090        | 1934          | 81               |
| Vegfa   | Itgav    | 1362        | 3688          | 82               |
| Cdh1    | Egfr     | 3752        | 1299          | 83               |
| Adam15  | Itga9    | 4927        | 130           | 84               |
| Nppc    | Npr2     | 1719        | 3339          | 85               |
| Dil1    | Notch4   | 583         | 4507          | 86               |
| Ntf3    | Ntrk2    | 1535        | 3569          | 87               |
| Pdgfc   | Pdgfrb   | 5137        | 23            | 88               |
| Bmp7    | Bmpr2    | 1472        | 3711          | 89               |
| Lpl     | Sdc1     | 1525        | 3661          | 90               |
| Sema3f  | Plxna3   | 748         | 4444          | 91               |
| Vegfc   | Itgb1    | 2908        | 2286          | 92               |
| L1cam   | Egfr     | 3935        | 1299          | 93               |
| Vtn     | Itgb1    | 3061        | 2286          | 94               |
| Sema3f  | Plxna1   | 748         | 4650          | 95               |
| Gm11808 | Acvr1    | 3043        | 2361          | 96               |
| Npnt    | Itgb1    | 3150        | 2286          | 97               |
| Ncam1   | Ptpna    | 215         | 5221          | 98               |
| Gm11808 | Agtr1a   | 3043        | 2400          | 99               |
| Fbln1   | Itgb1    | 3199        | 2286          | 100              |



Supplemental Table 1 RV-SP3

| Ligand  | Receptor  | Ligand rank | Receptor rank | Interaction rank |
|---------|-----------|-------------|---------------|------------------|
| Npy     | Fap       | 8           | 363           | 1                |
| Pdgfa   | Pdgfra    | 29          | 424           | 2                |
| Ncam1   | Robo1     | 215         | 311           | 3                |
| Vcan    | Egfr      | 280         | 439           | 4                |
| Ncam1   | Fgfr1     | 215         | 513           | 5                |
| Wnt4    | Fzd2      | 9           | 1160          | 6                |
| Lama1   | Itgb8     | 1135        | 113           | 7                |
| Pdgfa   | Pdgfrb    | 29          | 1304          | 8                |
| Efna4   | Epha7     | 784         | 597           | 9                |
| Tgfa    | Egfr      | 1041        | 439           | 10               |
| Fgf8    | Fgfr1     | 977         | 513           | 11               |
| Fgf15   | Fgfr1     | 1023        | 513           | 12               |
| Bmp4    | Bmpr1a    | 345         | 1247          | 13               |
| Vegfa   | Itga9     | 1362        | 245           | 14               |
| Vegfa   | Egfr      | 1362        | 439           | 15               |
| Bmp2    | Bmpr1a    | 802         | 1247          | 16               |
| Sema3f  | Nrp1      | 748         | 1661          | 17               |
| Ntf3    | Ntrk2     | 1535        | 882           | 18               |
| Slit2   | Robo2     | 1956        | 537           | 19               |
| Ncam1   | Cacna1c   | 215         | 2376          | 20               |
| Efnb1   | Ephb2     | 446         | 2153          | 21               |
| Bmp7    | Bmpr1a    | 1472        | 1247          | 22               |
| Col4a1  | Itgb8     | 2644        | 113           | 23               |
| Gnai2   | F2r       | 2696        | 217           | 24               |
| Vegfa   | Nrp1      | 1362        | 1661          | 25               |
| Efna1   | Epha7     | 2447        | 597           | 26               |
| Gnai2   | Egfr      | 2696        | 439           | 27               |
| Vegfc   | Itga9     | 2908        | 245           | 28               |
| Vtn     | Itgb8     | 3061        | 113           | 29               |
| Ncam1   | Ptpn11    | 215         | 2986          | 30               |
| Tac2    | Tacr3     | 1499        | 1835          | 31               |
| Vtn     | Tnfrsf11b | 3061        | 292           | 32               |
| Mfge8   | Pdgfrb    | 2059        | 1304          | 33               |
| Bmp2    | Eng       | 802         | 2586          | 34               |
| Slit2   | Robo1     | 3090        | 311           | 35               |
| Gnai2   | Aqtr2     | 2696        | 710           | 36               |
| Cicf1   | Cntfr     | 1341        | 2119          | 37               |
| Gm11808 | Egfr      | 3043        | 439           | 38               |
| Vegfa   | Ephb2     | 1362        | 2153          | 39               |
| Efna2   | Epha7     | 2978        | 597           | 40               |
| Bmp4    | Acvr1     | 345         | 3234          | 41               |
| Gnai2   | Ptpn11    | 2696        | 894           | 42               |
| Slit2   | Robo2     | 3090        | 537           | 43               |
| Efnb2   | Ephb2     | 1520        | 2153          | 44               |
| Fgf9    | Fgfr1     | 3166        | 513           | 45               |
| Sema3f  | Plxn1     | 748         | 3162          | 46               |
| Plat    | Lrp1      | 593         | 3426          | 47               |
| Bmp2    | Acvr1     | 802         | 3234          | 48               |
| Bmp7    | Eng       | 1472        | 2586          | 49               |
| Efnb1   | Ephb3     | 446         | 3684          | 50               |
| Sema3f  | Plxn3     | 748         | 3409          | 51               |
| Ncam1   | Gfra1     | 215         | 3947          | 52               |
| Cdh1    | Egfr      | 3752        | 439           | 53               |
| Prss23  | Tmem222   | 1048        | 3148          | 54               |
| Gnai2   | S1pr3     | 2696        | 1647          | 55               |
| Gdf5    | Ror2      | 3296        | 1064          | 56               |
| L1cam   | Egfr      | 3935        | 439           | 57               |
| Efnb1   | Ephb4     | 446         | 3962          | 58               |
| Jag1    | Notch2    | 94          | 4420          | 59               |
| Gdf5    | Bmpr1a    | 3296        | 1247          | 60               |
| Lpl     | Sdc1      | 1525        | 3092          | 61               |
| Bmp7    | Acvr1     | 1472        | 3234          | 62               |
| Clec11a | Kit       | 2642        | 2151          | 63               |
| Lpl     | Lrp1      | 1525        | 3426          | 64               |
| Dll1    | Notch2    | 583         | 4420          | 65               |
| Adam10  | Axl       | 3668        | 1500          | 66               |
| Adam15  | Itga9     | 4927        | 245           | 67               |
| Jag1    | Notch1    | 94          | 5097          | 68               |
| Efnb2   | Ephb3     | 1520        | 3684          | 69               |
| Cdh1    | Cdh2      | 3752        | 1499          | 70               |
| Col2a1  | Itga2b    | 891         | 4457          | 71               |
| Vcan    | Itgb1     | 280         | 5139          | 72               |
| Rspo1   | Fzd8      | 151         | 5270          | 73               |
| Lama4   | Itgb1     | 312         | 5139          | 74               |
| Lamc1   | Itgb1     | 327         | 5139          | 75               |
| Efnb2   | Ephb4     | 1520        | 3962          | 76               |
| Bmp4    | Bmpr2     | 345         | 5145          | 77               |
| Pdgfc   | Pdgfra    | 5137        | 424           | 78               |
| Fgf16   | Fgfr1     | 5097        | 513           | 79               |
| Efna5   | Epha7     | 5025        | 597           | 80               |
| Dll1    | Notch1    | 583         | 5097          | 81               |
| Jag1    | Notch4    | 94          | 5833          | 82               |
| Bmp2    | Bmpr2     | 802         | 5145          | 83               |
| Fgf10   | Fgfr1     | 5465        | 513           | 84               |
| Col2a1  | Itgb1     | 891         | 5139          | 85               |
| Sema4a  | Plxnd1    | 4449        | 1618          | 86               |
| L1cam   | Ephb2     | 3935        | 2153          | 87               |
| Lamb1   | Itgb1     | 1034        | 5139          | 88               |
| Ltbp1   | Itgb5     | 462         | 5717          | 89               |
| Slit2   | Sdc1      | 3090        | 3092          | 90               |
| Lama1   | Itgb1     | 1135        | 5139          | 91               |
| Gm11808 | Acvr1     | 3043        | 3234          | 92               |
| Nppc    | Npr2      | 1719        | 4618          | 93               |
| Tgfa    | ErbB4     | 1041        | 5315          | 94               |
| Rspo1   | Lrp6      | 151         | 6225          | 95               |
| Dll1    | Notch4    | 583         | 5833          | 96               |
| Pdgfc   | Pdgfrb    | 5137        | 1304          | 97               |
| Nppc    | Npr3      | 1719        | 4756          | 98               |
| Vegfa   | Itgb1     | 1362        | 5139          | 99               |
| Gdf5    | Acvr1     | 3296        | 3234          | 100              |

Supplemental Table 1 RV-UB

| Ligand  | Receptor | Ligand rank | Receptor rank | Interaction rank |
|---------|----------|-------------|---------------|------------------|
| Ncam1   | Gfra1    | 215         | 2             | 1                |
| Ncam1   | Fgfr2    | 215         | 137           | 2                |
| Rspo1   | Lgr5     | 151         | 298           | 3                |
| Bmp4    | Bmpr1b   | 345         | 130           | 4                |
| Bmp2    | Bmpr1b   | 802         | 130           | 5                |
| Fgf8    | Fgfr2    | 977         | 137           | 6                |
| Fgf15   | Fgfr2    | 1023        | 137           | 7                |
| Cicf1   | Crif1    | 1341        | 10            | 8                |
| Vegfa   | Ret      | 1362        | 3             | 9                |
| Efnb1   | Erb2     | 446         | 1009          | 10               |
| Lpl     | Vldlr    | 1525        | 29            | 11               |
| Bmp7    | Bmpr1b   | 1472        | 130           | 12               |
| Pcsk9   | Vldlr    | 1583        | 29            | 13               |
| Efnb1   | Ephb2    | 446         | 1248          | 14               |
| Efnb1   | Epha4    | 446         | 1380          | 15               |
| Rspo1   | Znrf3    | 151         | 1829          | 16               |
| Tgfa    | Erb2     | 1041        | 1009          | 17               |
| Efna4   | Epha4    | 784         | 1380          | 18               |
| Ltbp1   | Itgb5    | 462         | 1810          | 19               |
| Lama4   | Itga6    | 312         | 1961          | 20               |
| Lamc1   | Itga6    | 327         | 1961          | 21               |
| Lama1   | Sdc4     | 1135        | 1432          | 22               |
| Vegfa   | Ephb2    | 1362        | 1248          | 23               |
| Rspo4   | Lgr5     | 2366        | 298           | 24               |
| Efnb2   | Ephb2    | 1520        | 1248          | 25               |
| Tgfa    | Erb2     | 1041        | 1843          | 26               |
| Efnb2   | Epha4    | 1520        | 1380          | 27               |
| Gnai2   | Adora1   | 2696        | 214           | 28               |
| Jag1    | Notch1   | 94          | 2893          | 29               |
| Bmp4    | Bmpr1a   | 345         | 2644          | 30               |
| Itgb3bp | Itgb5    | 1180        | 1810          | 31               |
| Lamb1   | Itga6    | 1034        | 1961          | 32               |
| Lama1   | Itga6    | 1135        | 1961          | 33               |
| Gm11808 | Bmpr1b   | 3043        | 130           | 34               |
| Efna4   | Epha1    | 784         | 2389          | 35               |
| Fgf9    | Fgfr2    | 3166        | 137           | 36               |
| Gdf5    | Bmpr1b   | 3296        | 130           | 37               |
| Bmp2    | Bmpr1a   | 802         | 2644          | 38               |
| Rspo1   | Lrp6     | 151         | 3312          | 39               |
| Dll1    | Notch1   | 583         | 2893          | 40               |
| Rgmb    | Bmpr1b   | 3588        | 130           | 41               |
| Bmp4    | Acvr2a   | 345         | 3452          | 42               |
| Gnai2   | Unc5b    | 2696        | 1104          | 43               |
| Rgmb    | Neo1     | 3588        | 215           | 44               |
| Efna1   | Epha4    | 2447        | 1380          | 45               |
| Sema5a  | Met      | 2866        | 1018          | 46               |
| Gnai2   | Igf1r    | 2696        | 1258          | 47               |
| Gm11808 | Erb2     | 3043        | 1009          | 48               |
| L1cam   | Fgfr2    | 3935        | 137           | 49               |
| Spint1  | St14     | 3848        | 255           | 50               |
| Cdh1    | Ptprf    | 3752        | 352           | 51               |
| Bmp7    | Bmpr1a   | 1472        | 2644          | 52               |
| Igf2    | Igf1r    | 2986        | 1258          | 53               |
| Bmp2    | Acvr2a   | 802         | 3452          | 54               |
| Lamc1   | Itgb4    | 327         | 3929          | 55               |
| Lama4   | Itga3    | 312         | 3958          | 56               |
| Lamc1   | Itga3    | 327         | 3958          | 57               |
| Efna2   | Epha4    | 2978        | 1380          | 58               |
| Lamc2   | Itga6    | 2453        | 1961          | 59               |
| Efnb2   | Rhbdl2   | 1520        | 3092          | 60               |
| Wnt4    | Fzd6     | 9           | 4716          | 61               |
| Lamc2   | Cd151    | 2453        | 2277          | 62               |
| Efna1   | Epha1    | 2447        | 2389          | 63               |
| Lama5   | Bcam     | 4093        | 772           | 64               |
| Vtn     | Itgb5    | 3061        | 1810          | 65               |
| Bmp7    | Acvr2a   | 1472        | 3452          | 66               |
| Col2a1  | Itga10   | 891         | 4048          | 67               |
| L1cam   | Erb2     | 3935        | 1009          | 68               |
| Aggrn   | Lrp4     | 2597        | 2356          | 69               |
| Lamb1   | Itgb4    | 1034        | 3929          | 70               |
| Lamb1   | Itga3    | 1034        | 3958          | 71               |
| Cdh1    | Igf1r    | 3752        | 1258          | 72               |
| Tgfa    | Erb2     | 1041        | 3994          | 73               |
| Sema3f  | Plxna3   | 748         | 4314          | 74               |
| Lama1   | Itgb4    | 1135        | 3929          | 75               |
| Efnb1   | Ephb6    | 446         | 4629          | 76               |
| Lama1   | Itga3    | 1135        | 3958          | 77               |
| Lama1   | Gpc1     | 1135        | 3959          | 78               |
| L1cam   | Ephb2    | 3935        | 1248          | 79               |
| Fgf16   | Fgfr2    | 5097        | 137           | 80               |
| Vegfa   | Gpc1     | 1362        | 3959          | 81               |
| Efna2   | Epha1    | 2978        | 2389          | 82               |
| Sema3f  | Plxna1   | 748         | 4622          | 83               |
| Efnb1   | Ephb3    | 446         | 4939          | 84               |
| Vcan    | Itga4    | 280         | 5129          | 85               |
| Lamc3   | Itga6    | 3462        | 1961          | 86               |
| Vegfa   | Sirpa    | 1362        | 4078          | 87               |
| Prss23  | Tmem222  | 1048        | 4396          | 88               |
| Cdh1    | Erb2     | 3752        | 1843          | 89               |
| Fgf10   | Fgfr2    | 5465        | 137           | 90               |
| Cthrc1  | Fzd3     | 3806        | 1947          | 91               |
| L1cam   | Erb2     | 3935        | 1843          | 92               |
| Timp2   | Itga3    | 1841        | 3958          | 93               |
| Lpl     | Sdc1     | 1525        | 4403          | 94               |
| Gm11808 | Notch1   | 3043        | 2893          | 95               |
| Gdf5    | Bmpr1a   | 3296        | 2644          | 96               |
| Npy     | Npy2r    | 8           | 6038          | 97               |
| Lama5   | Itga6    | 4093        | 1961          | 98               |
| Sema4d  | Erb2     | 5069        | 1009          | 99               |
| Sema4d  | Met      | 5069        | 1018          | 100              |

Supplemental Table 1 UB-SP1

| Ligand        | Receptor | Ligand rank | Receptor rank | Interaction rank |
|---------------|----------|-------------|---------------|------------------|
| Nrtn          | Gfra2    | 17          | 124           | 1                |
| Bmp7          | Bmpr1a   | 59          | 203           | 2                |
| Cdh1          | Egfr     | 261         | 379           | 3                |
| Btc           | Egfr     | 322         | 379           | 4                |
| Cdh1          | Cdh2     | 261         | 585           | 5                |
| L1cam         | Ephb2    | 705         | 168           | 6                |
| Npy           | Fap      | 1017        | 16            | 7                |
| L1cam         | Egfr     | 705         | 379           | 8                |
| Wnt11         | Fzd7     | 41          | 1080          | 9                |
| Bmp7          | Acvr1    | 59          | 1347          | 10               |
| Lamc2         | Cd151    | 172         | 1269          | 11               |
| Slit2         | Sdc1     | 139         | 1316          | 12               |
| Slit2         | Robo2    | 139         | 1427          | 13               |
| Pdgfc         | Pdgfra   | 1664        | 89            | 14               |
| Sema6a        | Plxna2   | 92          | 1959          | 15               |
| Efnb2         | Ephb2    | 2019        | 168           | 16               |
| Lama5         | Sdc1     | 1057        | 1316          | 17               |
| Lamc2         | Itgb1    | 172         | 2281          | 18               |
| Col18a1       | Gpc4     | 1610        | 992           | 19               |
| Npnt          | Itgb1    | 338         | 2281          | 20               |
| Cgn           | F11r     | 2929        | 295           | 21               |
| Lama5         | Itgb1    | 1057        | 2281          | 22               |
| Pdgfa         | Pdgfra   | 3390        | 89            | 23               |
| Hspg2         | Ptprs    | 2912        | 764           | 24               |
| Lamc1         | Itgb1    | 1441        | 2281          | 25               |
| L1cam         | Itgav    | 705         | 3116          | 26               |
| Col18a1       | Itgb1    | 1610        | 2281          | 27               |
| Bmp8b         | Bmpr1a   | 3723        | 203           | 28               |
| Lamb1         | Itgb1    | 1668        | 2281          | 29               |
| Sema3d        | Nrp1     | 749         | 3252          | 30               |
| Sema3c        | Nrp1     | 771         | 3252          | 31               |
| BC055324      | Plscr4   | 2963        | 1070          | 32               |
| Hspg2         | Sdc1     | 2912        | 1316          | 33               |
| Shh           | Boc      | 4144        | 114           | 34               |
| Slit2         | Gpc1     | 139         | 4138          | 35               |
| Col4a1        | Itgb8    | 3909        | 372           | 36               |
| Sema3f        | Nrp1     | 1051        | 3252          | 37               |
| Gm11808       | Egfr     | 3949        | 379           | 38               |
| Shh           | Cdon     | 4144        | 217           | 39               |
| Prss23        | Tmem222  | 1609        | 2805          | 40               |
| Lamc1         | Itga1    | 1441        | 3084          | 41               |
| Ctf1          | Il6st    | 379         | 4172          | 42               |
| Lamc1         | Itgav    | 1441        | 3116          | 43               |
| Lamb1         | Itga1    | 1668        | 3084          | 44               |
| Lamb1         | Itgav    | 1668        | 3116          | 45               |
| Shh           | Smo      | 4144        | 681           | 46               |
| Pdgfc         | Pdgfrb   | 1664        | 3165          | 47               |
| Serpine2      | Lrp1     | 4321        | 545           | 48               |
| Tac1          | Tacr3    | 2816        | 2122          | 49               |
| App           | Lrp1     | 4431        | 545           | 50               |
| Bmp8b         | Acvr1    | 3723        | 1347          | 51               |
| Col4a1        | Cd47     | 3909        | 1260          | 52               |
| Ihh           | Boc      | 5074        | 114           | 53               |
| Hspg2         | Itgb1    | 2912        | 2281          | 54               |
| Sema4d        | Plxnb2   | 4111        | 1101          | 55               |
| Ihh           | Cdon     | 5074        | 217           | 56               |
| Gm11808       | Acvr1    | 3949        | 1347          | 57               |
| Shh           | Hhip     | 4144        | 1195          | 58               |
| Bcan          | Egfr     | 5100        | 379           | 59               |
| Npy           | Npy2r    | 1017        | 4478          | 60               |
| Col9a3        | Mag      | 38          | 5458          | 61               |
| Efna5         | Ephb2    | 5351        | 168           | 62               |
| Gdf5          | Bmpr1a   | 5373        | 203           | 63               |
| Lama1         | Itgb8    | 5217        | 372           | 64               |
| Col18a1       | Kdr      | 1610        | 3991          | 65               |
| Pdgfc         | Kdr      | 1664        | 3991          | 66               |
| App           | Cav1     | 4431        | 1294          | 67               |
| Col18a1       | Gpc1     | 1610        | 4138          | 68               |
| Efna4         | Epha5    | 53          | 5735          | 69               |
| Wnt5a         | Fzd2     | 5788        | 70            | 70               |
| Tgfa          | Egfr     | 5582        | 379           | 71               |
| Btc           | ErbB2    | 322         | 5746          | 72               |
| Efnb2         | Ephb3    | 2019        | 4130          | 73               |
| Col4a1        | Itgb1    | 3909        | 2281          | 74               |
| Gdf5          | Ror2     | 5373        | 825           | 75               |
| Lama1         | Sdc2     | 5217        | 986           | 76               |
| Wnt4          | Fzd2     | 6163        | 70            | 77               |
| Cgn           | Tgfb2    | 2929        | 3323          | 78               |
| 1700013F07Rik | Plscr4   | 5189        | 1070          | 79               |
| Ihh           | Hhip     | 5074        | 1195          | 80               |
| Sema3c        | Nrp2     | 771         | 5501          | 81               |
| Serpinc1      | Lrp1     | 5752        | 545           | 82               |
| Lamc2         | Itga3    | 172         | 6141          | 83               |
| Vegfa         | Ephb2    | 6167        | 168           | 84               |
| L1cam         | ErbB2    | 705         | 5746          | 85               |
| Bmp3          | Bmpr1a   | 6286        | 203           | 86               |
| Col9a1        | Mag      | 1031        | 5458          | 87               |
| Vegfa         | Egfr     | 6167        | 379           | 88               |
| Sema3f        | Nrp2     | 1051        | 5501          | 89               |
| Pdgfa         | Pdgfrb   | 3390        | 3165          | 90               |
| Efnb2         | Ephb4    | 2019        | 4581          | 91               |
| Shh           | Ptch2    | 4144        | 2457          | 92               |
| Wnt5a         | Ror2     | 5788        | 825           | 93               |
| Il11          | Gm13305  | 6455        | 162           | 94               |
| Anxa1         | Egfr     | 6255        | 379           | 95               |
| Lamb3         | Cd151    | 5432        | 1269          | 96               |
| Gdf5          | Acvr1    | 5373        | 1347          | 97               |
| Serpinc1      | Sdc2     | 5752        | 986           | 98               |
| Lrpap1        | Lrp1     | 6231        | 545           | 99               |
| Dusp18        | Cd151    | 5562        | 1269          | 100              |

Supplemental Table 1 UB-SP2

| Ligand   | Receptor | Ligand rank | Receptor rank | Interaction rank |
|----------|----------|-------------|---------------|------------------|
| Kitl     | Epor     | 114         | 378           | 1                |
| Npnt     | Itga8    | 338         | 521           | 2                |
| Sema3d   | Nrp1     | 749         | 215           | 3                |
| Sema3c   | Nrp1     | 771         | 215           | 4                |
| Sema3f   | Nrp1     | 1051        | 215           | 5                |
| Cdh1     | Egfr     | 261         | 1299          | 6                |
| Bmp7     | Eng      | 59          | 1503          | 7                |
| Btc      | Egfr     | 322         | 1299          | 8                |
| Pdgfc    | Pdgfrb   | 1664        | 23            | 9                |
| L1cam    | Egfr     | 705         | 1299          | 10               |
| Fgf9     | Fgfr1    | 1118        | 888           | 11               |
| Wnt11    | Fzd7     | 41          | 1999          | 12               |
| Slit2    | Robo2    | 139         | 1917          | 13               |
| Slit2    | Robo1    | 139         | 1934          | 14               |
| Npy      | Fap      | 1017        | 1236          | 15               |
| Bmp7     | Bmpr1a   | 59          | 2345          | 16               |
| Bmp7     | Acvr1    | 59          | 2361          | 17               |
| Pdgfc    | Pdgfra   | 1664        | 756           | 18               |
| Lamc2    | Itgb1    | 172         | 2286          | 19               |
| Npnt     | Itgb1    | 338         | 2286          | 20               |
| Lamc1    | Itga1    | 1441        | 1225          | 21               |
| Fgf12    | Fgfr1    | 1951        | 888           | 22               |
| Lamb1    | Itga1    | 1668        | 1225          | 23               |
| Ctf1     | Il6st    | 379         | 2891          | 24               |
| Jag1     | Notch3   | 1811        | 1521          | 25               |
| Lama5    | Itgb1    | 1057        | 2286          | 26               |
| Sema3c   | Plxnd1   | 771         | 2573          | 27               |
| Pdgfa    | Pdgfrb   | 3390        | 23            | 28               |
| Bmp7     | Acvr2a   | 59          | 3481          | 29               |
| Prss23   | Tmem222  | 1609        | 2058          | 30               |
| Lamc1    | Itgb1    | 1441        | 2286          | 31               |
| Bmp7     | Bmpr2    | 59          | 3711          | 32               |
| Slit2    | Sdc1     | 139         | 3661          | 33               |
| Cntn2    | Nrp1     | 3656        | 215           | 34               |
| Col18a1  | Itgb1    | 1610        | 2286          | 35               |
| Lamb1    | Itgb1    | 1668        | 2286          | 36               |
| Pdgfa    | Pdgfra   | 3390        | 756           | 37               |
| Wnt7b    | Fzd1     | 3770        | 416           | 38               |
| Itgb3bp  | Itgb5    | 1539        | 2719          | 39               |
| Shh      | Boc      | 4144        | 173           | 40               |
| Jag1     | Notch1   | 1811        | 2535          | 41               |
| L1cam    | Itgav    | 705         | 3688          | 42               |
| Nlgn3    | Nrxn1    | 2037        | 2422          | 43               |
| Hspg2    | Ptprs    | 2912        | 1554          | 44               |
| Shh      | Smo      | 4144        | 446           | 45               |
| Sema4a   | Plxnd1   | 2140        | 2573          | 46               |
| Lama5    | Sdc1     | 1057        | 3661          | 47               |
| Col4a1   | Itgb8    | 3909        | 1100          | 48               |
| Sema6a   | Plxna2   | 92          | 5011          | 49               |
| Lamc1    | Itgav    | 1441        | 3688          | 50               |
| Col4a1   | Itga1    | 3909        | 1225          | 51               |
| Fgf18    | Fgfr1    | 4294        | 888           | 52               |
| Hspg2    | Itgb1    | 2912        | 2286          | 53               |
| Efna4    | Epha3    | 53          | 5167          | 54               |
| Ihh      | Boc      | 5074        | 173           | 55               |
| Gm11808  | Egfr     | 3949        | 1299          | 56               |
| Fgf17    | Fgfr1    | 4395        | 888           | 57               |
| Lamb1    | Itgav    | 1668        | 3688          | 58               |
| Sema3f   | Plxna3   | 1051        | 4444          | 59               |
| Sema3f   | Plxna1   | 1051        | 4650          | 60               |
| Ltbp1    | Itgb5    | 3136        | 2719          | 61               |
| L1cam    | Itga5    | 705         | 5159          | 62               |
| Efna4    | Epha7    | 53          | 5902          | 63               |
| Ctf1     | Lifr     | 379         | 5686          | 64               |
| Bmp8b    | Bmpr1a   | 3723        | 2345          | 65               |
| Bmp8b    | Acvr1    | 3723        | 2361          | 66               |
| Gdf5     | Ror2     | 5373        | 786           | 67               |
| Mfap2    | Notch1   | 3648        | 2535          | 68               |
| Col4a1   | Itgb1    | 3909        | 2286          | 69               |
| Wnt5a    | Fzd1     | 5788        | 416           | 70               |
| Vegfa    | Itga9    | 6167        | 130           | 71               |
| Gm11808  | Acvr1    | 3949        | 2361          | 72               |
| Lama1    | Itgb8    | 5217        | 1100          | 73               |
| Jag1     | Notch4   | 1811        | 4507          | 74               |
| Gm11808  | Agtr1a   | 3949        | 2400          | 75               |
| Wnt5a    | Ror1     | 5788        | 573           | 76               |
| Vegfa    | Nrp1     | 6167        | 215           | 77               |
| Bcan     | Egfr     | 5100        | 1299          | 78               |
| Lama1    | Itga1    | 5217        | 1225          | 79               |
| Gm11808  | Notch1   | 3949        | 2535          | 80               |
| Kitl     | Kit      | 114         | 6397          | 81               |
| Cdh1     | Cdh2     | 261         | 6264          | 82               |
| Serpine2 | Lrp1     | 4321        | 2219          | 83               |
| Hspg2    | Sdc1     | 2912        | 3661          | 84               |
| Wnt5a    | Ror2     | 5788        | 786           | 85               |
| App      | Lrp1     | 4431        | 2219          | 86               |
| Myoc     | Fzd1     | 6289        | 416           | 87               |
| Efna4    | Epha1    | 53          | 6700          | 88               |
| Col18a1  | Itga5    | 1610        | 5159          | 89               |
| Dusp18   | Itga1    | 5562        | 1225          | 90               |
| Tgfa     | Egfr     | 5582        | 1299          | 91               |
| Timp2    | Itgb1    | 4792        | 2286          | 92               |
| Il11     | Gm13305  | 6455        | 633           | 93               |
| Tac1     | Tacr3    | 2816        | 4289          | 94               |
| Efnb2    | Epha3    | 2019        | 5167          | 95               |
| Bmp8b    | Acvr2a   | 3723        | 3481          | 96               |
| Edn1     | Ednra    | 6997        | 208           | 97               |
| Il7      | Il2rg    | 3521        | 3697          | 98               |
| Ncam1    | Fgfr1    | 6380        | 888           | 99               |
| Dhh      | Boc      | 7140        | 173           | 100              |

Supplemental Table 1 UB-SP3

| Ligand  | Receptor | Ligand rank | Receptor rank | Interaction rank |
|---------|----------|-------------|---------------|------------------|
| Slit2   | Robo1    | 139         | 311           | 1                |
| Efna4   | Epha7    | 53          | 597           | 2                |
| Slit2   | Robo2    | 139         | 537           | 3                |
| Cdh1    | Egfr     | 261         | 439           | 4                |
| Btc     | Egfr     | 322         | 439           | 5                |
| L1cam   | Egfr     | 705         | 439           | 6                |
| Bmp7    | Bmpr1a   | 59          | 1247          | 7                |
| Npy     | Fap      | 1017        | 363           | 8                |
| Fgf9    | Fgfr1    | 1118        | 513           | 9                |
| Cdh1    | Cdh2     | 261         | 1499          | 10               |
| Pdgfc   | Pdgfra   | 1664        | 424           | 11               |
| Kitl    | Kit      | 114         | 2151          | 12               |
| Sema3c  | Plxnd1   | 771         | 1618          | 13               |
| Sema3d  | Nrp1     | 749         | 1661          | 14               |
| Sema3c  | Nrp1     | 771         | 1661          | 15               |
| Fgf12   | Fgfr1    | 1951        | 513           | 16               |
| Kitl    | Epor     | 114         | 2414          | 17               |
| Bmp7    | Eng      | 59          | 2586          | 18               |
| Sema3f  | Nrp1     | 1051        | 1661          | 19               |
| L1cam   | Ephb2    | 705         | 2153          | 20               |
| Pdgfc   | Pdgfrb   | 1664        | 1304          | 21               |
| Slit2   | Sdc1     | 139         | 3092          | 22               |
| Bmp7    | Acvr1    | 59          | 3234          | 23               |
| Cdh1    | Itgae    | 261         | 3048          | 24               |
| Sema4a  | Plxnd1   | 2140        | 1618          | 25               |
| Pdgfa   | Pdgfra   | 3390        | 424           | 26               |
| Nrtn    | Gfra1    | 17          | 3947          | 27               |
| Col4a1  | Itgb8    | 3909        | 113           | 28               |
| Lama5   | Sdc1     | 1057        | 3092          | 29               |
| Efnb2   | Ephb2    | 2019        | 2153          | 30               |
| Sema3f  | Plxna1   | 1051        | 3162          | 31               |
| Shh     | Boc      | 4144        | 105           | 32               |
| Gm11808 | Egfr     | 3949        | 439           | 33               |
| Sema3f  | Plxna3   | 1051        | 3409          | 34               |
| Tac1    | Tacr3    | 2816        | 1835          | 35               |
| Pdgfa   | Pdgfrb   | 3390        | 1304          | 36               |
| Hspg2   | Ptprs    | 2912        | 1812          | 37               |
| Prss23  | Tmem222  | 1609        | 3148          | 38               |
| Wnt7b   | Fzd1     | 3770        | 1024          | 39               |
| Fgf18   | Fgfr1    | 4294        | 513           | 40               |
| Cgn     | F11r     | 2929        | 1947          | 41               |
| Fgf17   | Fgfr1    | 4395        | 513           | 42               |
| Bmp8b   | Bmpr1a   | 3723        | 1247          | 43               |
| Shh     | Smo      | 4144        | 891           | 44               |
| Ihh     | Boc      | 5074        | 105           | 45               |
| Bmp7    | Bmpr2    | 59          | 5145          | 46               |
| Lamc2   | Itgb1    | 172         | 5139          | 47               |
| Cntn2   | Nrp1     | 3656        | 1661          | 48               |
| Lama1   | Itgb8    | 5217        | 113           | 49               |
| L1cam   | Itga5    | 705         | 4734          | 50               |
| Nlgn3   | Nrxn1    | 2037        | 3410          | 51               |
| Npnt    | Itgb1    | 338         | 5139          | 52               |
| Bcan    | Egfr     | 5100        | 439           | 53               |
| Cdh1    | Igf1r    | 261         | 5306          | 54               |
| Btc     | ErbB4    | 322         | 5315          | 55               |
| Cdh1    | Lrp5     | 261         | 5432          | 56               |
| Shh     | Cdon     | 4144        | 1550          | 57               |
| Efnb2   | Ephb3    | 2019        | 3684          | 58               |
| Efna5   | Epha7    | 5351        | 597           | 59               |
| Wnt5a   | Ror1     | 5788        | 161           | 60               |
| Efnb2   | Ephb4    | 2019        | 3962          | 61               |
| Hspg2   | Sdc1     | 2912        | 3092          | 62               |
| Tgfa    | Egfr     | 5582        | 439           | 63               |
| Lama5   | Itgb1    | 1057        | 5139          | 64               |
| Jag1    | Notch2   | 1811        | 4420          | 65               |
| Eda     | Edar     | 4171        | 2083          | 66               |
| Nrtn    | Gfra2    | 17          | 6297          | 67               |
| Col18a1 | Itga5    | 1610        | 4734          | 68               |
| Efna1   | Epha7    | 5758        | 597           | 69               |
| Vegfa   | Itga9    | 6167        | 245           | 70               |
| Efna4   | Epha5    | 53          | 6383          | 71               |
| Gdf5    | Ror2     | 5373        | 1064          | 72               |
| Lamc1   | Itgb1    | 1441        | 5139          | 73               |
| Wnt11   | Fzd7     | 41          | 6546          | 74               |
| Vegfa   | Egfr     | 6167        | 439           | 75               |
| Gdf5    | Bmpr1a   | 5373        | 1247          | 76               |
| Ihh     | Cdon     | 5074        | 1550          | 77               |
| Il11    | Gm13305  | 6455        | 193           | 78               |
| Ncam1   | Robo1    | 6380        | 311           | 79               |
| Anxa1   | Egfr     | 6255        | 439           | 80               |
| Col18a1 | Itgb1    | 1610        | 5139          | 81               |
| Lamb1   | Itgb1    | 1668        | 5139          | 82               |
| Wnt5a   | Fzd1     | 5788        | 1024          | 83               |
| Wnt5a   | Ror2     | 5788        | 1064          | 84               |
| Ncam1   | Fgfr1    | 6380        | 513           | 85               |
| Jag1    | Notch1   | 1811        | 5097          | 86               |
| Wnt5a   | Fzd2     | 5788        | 1160          | 87               |
| Bmp8b   | Acvr1    | 3723        | 3234          | 88               |
| Fgf16   | Fgfr1    | 6627        | 513           | 89               |
| Gm11808 | Acvr1    | 3949        | 3234          | 90               |
| Dhh     | Boc      | 7140        | 105           | 91               |
| Itgb3bp | Itgb5    | 1539        | 5717          | 92               |
| L1cam   | Itgav    | 705         | 6560          | 93               |
| Epgn    | Egfr     | 6873        | 439           | 94               |
| Myoc    | Fzd1     | 6289        | 1024          | 95               |
| Wnt4    | Fzd2     | 6163        | 1160          | 96               |
| Grp     | Grpr     | 3325        | 4033          | 97               |
| Efna5   | Ephb2    | 5351        | 2153          | 98               |
| Bmp3    | Bmpr1a   | 6286        | 1247          | 99               |
| Jag1    | Notch4   | 1811        | 5833          | 100              |

Supplemental Table 1 UB-RV

| Ligand   | Receptor | Ligand rank | Receptor rank | Interaction rank |
|----------|----------|-------------|---------------|------------------|
| Efna4    | Epha4    | 53          | 113           | 1                |
| Bmp7     | Acvr2b   | 59          | 281           | 2                |
| Slit2    | Sdc1     | 139         | 329           | 3                |
| Cdh1     | Cdh2     | 261         | 438           | 4                |
| Slit2    | Gpc1     | 139         | 712           | 5                |
| Efna4    | Epha7    | 53          | 1044          | 6                |
| Fgf9     | Fgfr1    | 1118        | 26            | 7                |
| Lama5    | Sdc1     | 1057        | 329           | 8                |
| Lamc2    | Itga6    | 172         | 1394          | 9                |
| L1cam    | Fgfr2    | 705         | 1003          | 10               |
| Jag1     | Notch1   | 1811        | 157           | 11               |
| Fgf12    | Fgfr1    | 1951        | 26            | 12               |
| Fgf9     | Fgfr2    | 1118        | 1003          | 13               |
| Efnb2    | Epha4    | 2019        | 113           | 14               |
| Col18a1  | Gpc1     | 1610        | 712           | 15               |
| Slit2    | Robo1    | 139         | 2214          | 16               |
| Lama5    | Itga6    | 1057        | 1394          | 17               |
| Lamc2    | Cd151    | 172         | 2323          | 18               |
| Lama5    | Bcam     | 1057        | 1452          | 19               |
| Lamc2    | Itga3    | 172         | 2445          | 20               |
| Cdh1     | Ptprm    | 261         | 2502          | 21               |
| Lamc1    | Itga6    | 1441        | 1394          | 22               |
| Fgf12    | Fgfr2    | 1951        | 1003          | 23               |
| Cdh1     | Igf1r    | 261         | 2769          | 24               |
| Lamb1    | Itga6    | 1668        | 1394          | 25               |
| Hspg2    | Col13a1  | 2912        | 158           | 26               |
| Hspg2    | Sdc1     | 2912        | 329           | 27               |
| Wnt11    | Fzd7     | 41          | 3385          | 28               |
| Jag1     | Notch2   | 1811        | 1618          | 29               |
| Lama5    | Itga3    | 1057        | 2445          | 30               |
| Nrtn     | Gfra1    | 17          | 3510          | 31               |
| Efnb2    | Ephb1    | 2019        | 1571          | 32               |
| Bmp7     | Bmpr1a   | 59          | 3658          | 33               |
| Cdh1     | Ptprf    | 261         | 3463          | 34               |
| Mfap2    | Notch1   | 3648        | 157           | 35               |
| Lamc1    | Itga3    | 1441        | 2445          | 36               |
| Lamc2    | Itgb4    | 172         | 3720          | 37               |
| Bmp9b    | Acvr2b   | 3723        | 281           | 38               |
| Gm11808  | Notch1   | 3949        | 157           | 39               |
| Lamb1    | Itga3    | 1668        | 2445          | 40               |
| Nlgn3    | Nrxn2    | 2037        | 2100          | 41               |
| Wnt7b    | Fzd10    | 3770        | 486           | 42               |
| Slit2    | Robo2    | 139         | 4134          | 43               |
| Fgf18    | Fgfr1    | 4294        | 26            | 44               |
| Fgf17    | Fgfr1    | 4395        | 26            | 45               |
| App      | Ngfr     | 4431        | 175           | 46               |
| Lama5    | Itgb4    | 1057        | 3720          | 47               |
| Spint1   | St14     | 368         | 4549          | 48               |
| App      | Gpc1     | 4431        | 712           | 49               |
| Lamc1    | Itgb4    | 1441        | 3720          | 50               |
| Agrr     | Lrp4     | 3593        | 1693          | 51               |
| Fgf18    | Fgfr2    | 4294        | 1003          | 52               |
| Jag1     | Notch4   | 1811        | 3487          | 53               |
| Hspg2    | Ptprs    | 2912        | 2473          | 54               |
| Lamb1    | Itgb4    | 1668        | 3720          | 55               |
| Fgf17    | Fgfr2    | 4395        | 1003          | 56               |
| Efna5    | Epha4    | 5351        | 113           | 57               |
| Prss23   | Tmem222  | 1609        | 3861          | 58               |
| Cgn      | Tgfb1    | 2929        | 2619          | 59               |
| Gdf5     | Acvr2b   | 5373        | 281           | 60               |
| Cd24a    | Selp     | 105         | 5619          | 61               |
| Oxt      | Oxtr     | 5503        | 293           | 62               |
| Efna1    | Epha4    | 5758        | 113           | 63               |
| Sema4d   | Plxnb1   | 4111        | 1781          | 64               |
| Lama1    | Gpc1     | 5217        | 712           | 65               |
| Fgf9     | Fgfr4    | 1118        | 4853          | 66               |
| L1cam    | Ephb2    | 705         | 5347          | 67               |
| Inhba    | Acvr2b   | 6107        | 281           | 68               |
| Sema3c   | Plxnd1   | 771         | 5617          | 69               |
| Efna5    | Epha7    | 5351        | 1044          | 70               |
| Ncam1    | Fgfr1    | 6380        | 26            | 71               |
| Serpinc1 | Gpc1     | 5752        | 712           | 72               |
| Cgn      | Ocln     | 2929        | 3615          | 73               |
| Bmp3     | Acvr2b   | 6286        | 281           | 74               |
| Gm11808  | Tgfb1    | 3949        | 2619          | 75               |
| Inhba    | Bambi    | 6107        | 499           | 76               |
| Lama1    | Itga6    | 5217        | 1394          | 77               |
| Fgf16    | Fgfr1    | 6627        | 26            | 78               |
| Myoc     | Fzd3     | 6289        | 380           | 79               |
| Sema3c   | Nrp2     | 771         | 5933          | 80               |
| Myoc     | Fzd10    | 6289        | 486           | 81               |
| Efna1    | Epha7    | 5758        | 1044          | 82               |
| Fgf12    | Fgfr4    | 1951        | 4853          | 83               |
| Lamb3    | Itga6    | 5432        | 1394          | 84               |
| Vegfa    | Gpc1     | 6167        | 712           | 85               |
| Efna5    | Ephb1    | 5351        | 1571          | 86               |
| Il2      | Ngfr     | 6756        | 175           | 87               |
| Dusp18   | Itga6    | 5562        | 1394          | 88               |
| Hhip12   | Cachd1   | 5382        | 1599          | 89               |
| Sema3f   | Nrp2     | 1051        | 5933          | 90               |
| Col18a1  | Gpc4     | 1610        | 5404          | 91               |
| App      | Slc45a3  | 4431        | 2593          | 92               |
| Rspo4    | Lgr4     | 5392        | 1708          | 93               |
| Pigf     | Flt1     | 341         | 6883          | 94               |
| Timp2    | Itga3    | 4792        | 2445          | 95               |
| Ntf3     | Ngfr     | 7067        | 175           | 96               |
| Sema3f   | Plxna3   | 1051        | 6193          | 97               |
| Kitl     | Epor     | 114         | 7140          | 98               |
| Tac1     | Tacr1    | 2816        | 4511          | 99               |
| Efna1    | Ephb1    | 5758        | 1571          | 100              |
